1 **The basolateral amygdala-anterior cingulate pathway contributes to depression and**  
2 **its comorbidity with chronic pain**

3 Léa J Becker<sup>a</sup>, Clémentine Fillinger<sup>a</sup>, Robin Waegaert<sup>a</sup>, Pierre Hener<sup>a,\*</sup>, Beyza Ayazgok<sup>a,b,\*</sup>,  
4 Muris Humo<sup>a,\*</sup>, Sarah H Journée<sup>a,\*</sup>, Meltem Karatas<sup>a,c,\*</sup>, Laetitia Degiorgis<sup>c</sup>, Marie des Neiges  
5 Santin<sup>c</sup>, Mary Mondino<sup>c</sup>, Michel Barrot<sup>a</sup>, El Chérif Ibrahim<sup>d</sup>, Gustavo Turecki<sup>e</sup>, Raoul  
6 Belzeaux<sup>d,f</sup>, Pierre Veinante<sup>a</sup>, Laura A Harsan<sup>c</sup>, Sylvain Hugel<sup>a</sup>, Pierre-Eric Lutz<sup>a,g,#</sup>, Ipek  
7 Yalcin<sup>a,h#</sup>.

8  
9 <sup>a</sup> *Centre National de la Recherche Scientifique, Université de Strasbourg, Institut des*  
10 *Neurosciences Cellulaires et Intégratives, Strasbourg, France*

11 <sup>b</sup> *Department of Biochemistry, Faculty of Pharmacy, University of Hacettepe, Ankara, Turkey*

12 <sup>c</sup> *Laboratory of Engineering, Informatics and Imaging (ICube), Integrative multimodal imaging*  
13 *in healthcare (IMIS), CNRS, UMR 7357, University of Strasbourg, Strasbourg, France*

14 <sup>d</sup> *INT UMR7289, CNRS Aix-Marseille Université, Marseille, France*

15 <sup>e</sup> *Department of Psychiatry, McGill University and Douglas Mental Health University Institute,*  
16 *Montreal, QC, Canada.*

17 <sup>f</sup> *Department de psychiatrie, Hôpitaux Universitaire de Marseille, France*

18 <sup>g</sup> *Douglas Mental Health University Institute, Montreal, QC, Canada*

19 <sup>h</sup> *Department of Psychiatry and Neuroscience, Université Laval, Québec QC G1V 0A6,*  
20 *Canada*

21

22

23 \* These authors contributed equally to this work

24 # These authors jointly supervised this work

25

26

27 Corresponding author:

28 Dr. Ipek Yalcin, INCI CNRS, 8 allée du Général Rouvillois, 67000 Strasbourg, France. e-mail  
29 address: [yalcin@inci-cnrs.unistra.fr](mailto:yalcin@inci-cnrs.unistra.fr)

30

31 **Keywords:** comorbidity, pain, depression, circuitry, basolateral amygdala, anterior cingulate  
32 cortex

33

34 **Content**

35 Word count: 4440

36 7 figures, 6 supplementary figures, 8 tables

37 **Abstract**

38 While depression and chronic pain are frequently comorbid, underlying neuronal circuits, and  
39 their relevance for the understanding of psychopathology, remain poorly defined. Here we  
40 show in mice that hyperactivity of the neuronal pathway linking the basolateral amygdala to  
41 the anterior cingulate cortex is essential for chronic pain-induced depression. In naive  
42 animals, we demonstrate that activation of this pathway is sufficient to trigger depressive-like  
43 behaviors, as well as transcriptomic alterations that recapitulate core molecular features of  
44 depression in the human brain. These alterations notably impact gene modules related to  
45 myelination and the oligodendrocyte lineage. Among these, we show that *Sema4a*, a hub  
46 gene significantly upregulated in both mice and humans in the context of altered mood, is  
47 necessary for the emergence of depressive-like behaviors. Overall, these results place the  
48 BLA-ACC pathway at the core of pain and depression comorbidity, and unravel the role of  
49 impaired myelination and *Sema4a* in mood control.

## 50 **Main**

51 Major depressive disorder (MDD) and chronic pain are long-lasting detrimental conditions  
52 that significantly contribute to the worldwide burden of disease<sup>1,2</sup>. These two pathologies are  
53 highly comorbid, which results in increased disability and poorer prognosis compared to  
54 either condition alone<sup>3,4</sup>. Despite their high prevalence and co-occurrence, available  
55 treatments remain ineffective, urging for a better understanding of the pathophysiology of  
56 this comorbidity.

57 The frontal cortex, particularly the anterior cingulate cortex (ACC), is at the center of  
58 emotional and pain processing<sup>5</sup>. A large body of evidence documents major alterations in  
59 ACC neuronal activity in patients with either chronic pain or MDD, as well as in rodent  
60 models of each condition<sup>6-9</sup>. Among other findings, our group previously showed that a  
61 lesion<sup>10</sup> or the optogenetic inhibition<sup>11</sup> of the ACC alleviates anxiodepressive-like  
62 consequences of neuropathic pain in mice, while activation of this structure is sufficient to  
63 trigger emotional dysfunction in naive animals. These results highlight a critical role of the  
64 ACC in the comorbidity between pain and MDD. However, the initial mechanisms priming  
65 ACC dysfunction remain poorly understood.

66 MDD originates from alterations affecting both the subcortical processing of external  
67 and internal stimuli, and their integration into perceived emotions by higher-level cortical  
68 structures<sup>12</sup>. It is, therefore, critical to understand how subcortical inputs to the ACC  
69 contribute to the emergence of emotional dysfunction. In extension to other afferences, the  
70 anterior part of the basolateral nucleus of the amygdala (BLA) shows dense, direct and  
71 reciprocal connections with the areas 24a/b of the ACC<sup>13,14</sup>, which have been poorly studied  
72 in animal models of pain and mood disorders. The BLA plays a critical role in emotional  
73 processes, since its neurons encode stimuli with a positive valence, such as rewards<sup>15,16</sup>, as  
74 well as those with a negative valence, including fear<sup>16</sup> or pain states<sup>17</sup>. In humans,  
75 neuroimaging studies have consistently found that depressed patients<sup>7,18</sup> and individuals  
76 with chronic pain<sup>6,19</sup> exhibit pathological ACC and BLA hyperactivity.

77 In this context, we hypothesized that the neuronal pathway linking the BLA and the  
78 ACC might represent a core substrate underlying the comorbidity between pain and MDD.  
79 First, using retrograde tracing and neuronal activity markers, as well as rodent brain  
80 functional magnetic resonance imaging (MRI), we demonstrate that this pathway is  
81 hyperactive when chronic pain triggers depressive-like behaviors. Then, by optogenetically  
82 manipulating this circuit, we show that its hyperactivity is both necessary for chronic pain-  
83 induced depressive-like (CPID) behaviors, and sufficient to trigger similar deficits in naive  
84 animal, in the absence of chronic pain. We next characterize transcriptomic changes  
85 occurring in the ACC when BLA-ACC hyperactivity triggers mood dysfunction, and find that  
86 they strikingly resemble the molecular blueprint of depression in humans. These results,

87 which notably include alterations affecting oligodendrocytes and myelination, are synergistic  
88 with our mouse imaging data showing altered tissue anisotropy along the BLA-ACC pathway,  
89 and establish the translational relevance of our BLA-ACC optogenetic model of MDD. Finally,  
90 we leverage gene network approaches to prioritize *Semaphorin 4A* (*Sema4A*) as a hub gene  
91 that is significantly upregulated in both mice and men in the context of altered mood. Using a  
92 gene knockdown approach, we demonstrate that, following optogenetic BLA-ACC  
93 stimulation, upregulation of *Sema4A* is necessary for the emergence of depressive-like  
94 behaviors. Overall, these results uncover the BLA-ACC pathway as a core substrate of pain  
95 and MDD comorbidity.

96

## 97 **Results**

98 ***Chronic neuropathic pain induces hyperactivity in the BLA-ACC pathway.*** To confirm  
99 the anatomical connection between the BLA and ACC, we first injected the retrograde tracer  
100 cholera toxin subunit B (CTB) into the areas 24a/b of the ACC (**Fig.1a**). Consistent with  
101 previous reports, strongly labelled cell bodies were found in the BLA (**Fig.1b**)<sup>13,20,21</sup>. Next,  
102 considering that we<sup>11</sup>, and others<sup>5,8,22</sup>, have found that the ACC is hyperactive when chronic  
103 pain triggers depressive-like behaviors, we wondered whether the BLA is similarly affected.  
104 To address this question, we quantified the immediate early gene c-Fos in our well-  
105 characterized CPID model<sup>23,24</sup>. In this model, peripheral nerve injury leads to immediate and  
106 long-lasting mechanical hypersensitivity, with delayed anxiodepressive-like behaviors  
107 (significant at 7 weeks post-operation, PO; **Fig.1c-f**). In our previous study, increased c-Fos  
108 immunoreactivity was found in the ACC at 8 weeks PO<sup>25</sup>. Here, a similar c-Fos increase  
109 was found in the BLA (**Extended Data Fig.1a-b**). This indicates concurrent neuronal  
110 hyperactivity of the 2 structures when anxiodepressive-like behaviors are present. Next, we  
111 studied whether these c-Fos positive cells in the BLA directly innervate the ACC (**Fig.1g**,  
112 right BLA, ipsilateral to nerve injury, **Extended Data Fig.1c**, left BLA, contralateral to nerve  
113 injury). The retrograde tracer fluorogold (FG) was injected into the ACC of neuropathic  
114 animals, and we quantified its co-localization with c-Fos in the BLA at 8 weeks PO (**Fig.1c**).  
115 Similar numbers of BLA neurons projecting to the ACC (FG+) were found in both sham and  
116 CPID groups, indicating that neuropathic pain does not modify the number of neurons in this  
117 pathway (**Fig.1h**). An increase in the total number of c-Fos+ cells was observed in the right  
118 BLA of CPID mice, compared to sham (**Fig.1i**), confirming results from our previous cohort  
119 (**Extended Data Fig.1a-b**). Importantly, neuronal hyperactivity was, notably, observed in  
120 ACC-projecting neurons in the CPID group, as evidenced by an increase in cells positive for  
121 both FG and c-Fos (**Fig.1j**; **Extended Data Fig.1d**) in the BLA ipsilateral to the nerve injury  
122 (see **Extended Data Fig.1e-g** for contralateral data). While a similar lateralization was

123 already reported in the central amygdala during chronic pain<sup>26,27</sup>, our results extend these  
124 findings to the BLA in the context of CPID. Finally, as a complementary strategy to assess  
125 the connectivity of the ACC and BLA, we took advantage of brain imaging data recently  
126 generated using resting-state functional Magnetic Resonance Imaging (rsfMRI). Consistent  
127 with above histological analyses, we observed that functional connectivity between the 2  
128 structures was enhanced at 8, but not 2, weeks PO in CPID animals compared to sham  
129 controls (**Fig.1k**; **Extended Data Fig.1h-i** for behavioral characterization). Altogether, these  
130 results indicate that chronic pain induces hyperactivity of BLA neurons projecting to the ACC.

131

132 **Optogenetic inhibition of the BLA-ACC pathway prevents CPID.** We next hypothesized  
133 that this hyperactivity may be responsible for emotional dysfunction. To address this, we  
134 inhibited this pathway using an AAV5-CamKIIa-ArchT3.0-EYFP vector injected bilaterally in  
135 the BLA (**Fig.2a-b**). To characterize the effects of green light illumination on BLA neurons,  
136 we performed *ex vivo* electrophysiological recordings 6 weeks after viral injection (**Fig.2c**).  
137 Patch-clamp recordings at the level of the BLA showed that light stimulation resulted in  
138 neuronal inhibition, proportional to light intensity, as indicated by outward currents recorded  
139 in voltage-clamp mode (**Fig.2d-e**).

140 To assess behavioral effects of inhibiting the BLA-ACC pathway in CPID, the same  
141 viral vector was injected bilaterally in the BLA, followed by implantation of an optic fiber in  
142 the ACC to specifically inhibit axon terminals coming from the BLA (**Fig.2f**). Acute inhibition  
143 did not impact mechanical thresholds, measured using von Frey, in sham (**Extended Data**  
144 **Fig.2a-b**) and nerve-injured animals at either 3 or 6 weeks PO (**Fig.2g-h**). The BLA-ACC  
145 pathway is, therefore, not essential for mechanical hypersensitivity, consistent with what  
146 several groups reported when manipulating the whole ACC<sup>10,28-30</sup>. Likewise, the BLA-ACC  
147 pathway does not drive ongoing pain, since we did not observe any significant conditioned  
148 place preference (CPP) during optogenetic inhibition (**Fig.2i**). Inhibiting the whole ACC was  
149 however sufficient to induce CPP in our previous work<sup>11</sup>. Therefore, modulation of pain  
150 states by the ACC likely recruits other structures than the BLA<sup>31</sup>.

151 We next assessed the effect of inhibiting the BLA-ACC pathway on anxiodepressive-  
152 like behaviors. Optogenetic inhibition was applied just before (for light/dark, LD, and forced  
153 swim tests, FST) or during behavioral testing (splash test, ST). As expected, CPID animal  
154 displayed significantly higher anxiety-like behaviors in the LD at 7 weeks PO (**Fig.2j**) and  
155 higher depressive-like behaviors at 8 weeks PO (**Fig.2k-l**), in both the ST and FST<sup>11,23</sup>.  
156 Inhibiting the BLA-ACC pathway had no impact in the LD test, suggesting that other  
157 pathways may control anxiety-like consequences of chronic pain. In contrast, BLA-ACC  
158 inhibition completely reversed pain-induced decreased grooming in the ST (**Fig.2k**), and  
159 significantly decreased immobility in the FST (**Fig.2l**), revealing potent antidepressant-like

160 effects. No effect of optogenetic inhibition was observed in sham animals, indicating that  
161 these antidepressant-like effects selectively manifest in the context of chronic pain. As a  
162 more general measure of emotionality<sup>32</sup>, we also calculated z-scores for each animal across  
163 tests (ST, FST). Results indicated that CPID mice showed global emotional deficit compared  
164 to sham controls, as indicated by lower z-scores, an effect that was completely prevented by  
165 inhibition of the BLA-ACC pathway (**Extended Data Fig.S2c**). Overall, these results  
166 demonstrate that hyperactivity of BLA neurons targeting the ACC is necessary for the  
167 selective expression of chronic pain-induced depressive-like behaviors.

168  
169 **Repeated activation of the BLA-ACC pathway triggers depressive-like behaviors in**  
170 **naive mice.** We next determined whether BLA-ACC hyperactivity is sufficient to induce  
171 depressive-like behaviors in naive mice, in the absence of neuropathic pain. An AAV5-  
172 CamKIIa-ChR2-EYFP vector was injected bilaterally in the BLA, and patch-clamp recordings  
173 confirmed that blue light stimulation (wavelength: 475nm, pulse duration: 10ms; frequency:  
174 10Hz) evoked inward currents in eYFP-expressing BLA neurons, as well as evoked  
175 excitatory postsynaptic currents in pyramidal ACC neurons (**Fig.3a-h**). In the BLA,  
176 optogenetic stimulation of cell bodies induced inward currents, with a plateau reached at 40%  
177 of maximal light intensity, while pulsed 10Hz stimulation produced strong and stable currents  
178 (**Fig.3b-d**). In the ACC, stimulating BLA axon terminals induced strong inward currents, with  
179 a plateau at 80% of maximal light (**Fig.3g-h**), indicating activation of ACC neurons.

180 Having established this stimulation protocol, we explored its behavioral impact in  
181 naive mice. An optic fiber was implanted in the ACC, and blue light pulse stimulation applied  
182 for 20min (with parameters validated *ex vivo*). We first showed that a single session of  
183 stimulation was not sufficient to trigger any alterations in spontaneous locomotor activity,  
184 real-time place avoidance or anxiodepressive-like assays (**Extended Data Fig.3a-d**). Thus,  
185 we next tested the effects of stimulations repeated over 3 consecutive days each week,  
186 during 3 weeks (**Fig.3i-k**). Behavioral tests were performed following each block of 3  
187 activating sessions (i.e. at the end of week 1, 2 or 3). No effects were found on locomotor  
188 activity (**Extended Data Fig.3e**) or anxiety-like behaviors (**Fig.3j**, LD/NSF), consistent with  
189 above CPID results indicating that optogenetic inhibition of the pathway did not rescue pain-  
190 induced anxiety-like behaviors. In contrast, depressive-like behaviors progressively emerged:  
191 (i) After the first 3 stimulations, no change was observed (**Fig.3j**, ST/Nest test); (ii) After 6  
192 stimulations, immobility in the FST significantly increased (**Fig.3k**, left panel), with a  
193 tendency for decreased nest building, without significant effects in the ST; (iii) After 9  
194 stimulations, emotional deficits further strengthened, as increased immobility in the FST  
195 (**Fig.3k**, right panel) was accompanied by a significantly poorer nest score, along with  
196 decreased grooming in the ST (**Fig.3j**). Of note, none of these effects remained detectable

197 one week after the last stimulation (**Extended Data Fig.3f-g**), indicating a reversible  
198 phenotype.

199 To determine which neuronal cell-types of the ACC are activated in this paradigm, we  
200 next quantified c-Fos expression (immunohistochemistry) and its co-localization (RNAscope)  
201 with markers of excitatory (glutamatergic, *Slc17a7*) and inhibitory (GABAergic, *Gad2*)  
202 neurons. Repeated optogenetic activation induced a strong increase in c-Fos expression  
203 (**Extended Data Fig.3h**), predominantly in glutamatergic but also GABAergic cells (**Fig.3l-m**,  
204 **Extended Data Fig.3i-j**) of the ACC (24a/24b), while global numbers of *Gad2+* or *Slc17a7+*  
205 cells remained unaltered (**Extended Data Fig.3k-m**). Altogether, these results show that  
206 repeated activation of the BLA-ACC pathway is sufficient to activate major neuronal cell  
207 types in the ACC, and triggers the progressive emergence of a depressive-like phenotype.

208

209 ***Repeated activation of the BLA-ACC pathway produces transcriptional alterations***  
210 ***similar to those observed in human depression.*** The need for repeated activations to  
211 produce behavioral effects suggests transcriptomic alterations within the ACC. To  
212 understand underlying molecular mechanisms, we used RNA-Sequencing to identify gene  
213 expression changes occurring in the ACC (**Extended Data Table S1**) after 9 stimulations  
214 (**Fig.4a**), when behavioral deficits are maximal. We generated 2 animal cohorts (n=12  
215 controls and n=10 stimulated mice in total) and, before harvesting ACC tissue, confirmed the  
216 development of depressive-like behaviors (**Fig.4b**). Analysis of gene expression changes  
217 was conducted as described previously<sup>33</sup> (see material and methods). Using Principal  
218 Component Analysis, robust differences were observed across groups at genome-wide level  
219 (**Extended Data Fig.4a**). At nominal p-value (p<0.05), 2611 genes were significantly  
220 dysregulated in stimulated mice compared to controls, with 54 genes remaining significant  
221 after Benjamini-Hochberg correction for multiple testing (**Fig.4c**). Over-Representation  
222 Analysis<sup>34</sup> (ORA) uncovered alterations in Gene Ontology (GO) terms related to myelination,  
223 dendritic transport, neurogenesis and cytoskeleton (**Table S1; Extended Data Fig.4b**).

224 To test relevance of these data to human depression, we compared them to our  
225 recent post-mortem study<sup>35</sup>. In the later, similar RNA-Seq was used to compare ACC tissue  
226 from individuals who died during a major depressive episode (n=26; **Extended Data Table**  
227 **S2**), and healthy individuals without any psychiatric history (n=24). Because only male mice  
228 were used in our paradigm, we reprocessed human data to restrict differential expression  
229 analysis to men (for a similar analysis using data generated from both sexes, see **Extended**  
230 **Data Fig.5**). We then used 3 strategies to compare men and mice, focusing on 13 572  
231 orthologues (see Methods). First, 398 genes were identified as differentially expressed (DEG,  
232 nominal p-value<0.05) in both species (common DEGs; **Extended Data Fig.4c**). These  
233 represented 29.6% of all DEGs in mice (34.9% when considering both men and women;

234 **Extended Data Fig.5a-b**), indicating robust overlap between species (**Extended Data**  
235 **Fig.4d**). ORA performed on common DEGs revealed enrichments in GO term related to  
236 neurogenesis, cytoskeleton or myelin sheath (**Extended Data Fig.4e**). Second, for a more  
237 systematic threshold-free comparison, we used RRHO2, for Rank-Rank Hypergeometric  
238 Overlap<sup>36</sup>. This analysis uncovered large patterns of transcriptional dysregulation in similar  
239 directions as a function of MDD in men, and of optogenetic activation in mice. Indeed, strong  
240 overlaps were observed between species for both up-regulated and down-regulated genes  
241 (**Fig.4d**), notably affecting pathways related to oligodendrocyte cell fate and myelination  
242 (**Table S3-4**). Third, because results repeatedly pointed towards myelin, we used Gene Set  
243 Enrichment Analysis (GSEA, **Fig.4e-g**) to interrogate a well-characterized list of 76 genes  
244 primarily expressed by oligodendrocytes, encompassing their major biological functions<sup>37</sup>.  
245 Among these, 48 (63%; **Fig.4e**) were down-regulated in stimulated mice, and 57 in men with  
246 MDD (75%; **Fig.4f**). This pattern of myelin down-regulation strongly correlated across  
247 species (**Fig.4g**). Altogether, these 3 approaches (common DEG, RRHO2 and GSEA)  
248 converged to reveal significant dysregulation of myelination (see **Extended Data Fig.4e-g**,  
249 **5c-e**).

250

251 **Gene ontology pathways affected in mice and men point towards altered**  
252 **oligodendrocyte function**. To better capture the modular disorganization of gene  
253 expression in MDD, we then used weighted gene co-expression network analysis, WGCNA<sup>38</sup>,  
254 similar to our recent work<sup>39</sup>. Gene networks, constructed independently in each species,  
255 were composed of 25 and 29 gene modules in mice and humans, respectively. Using  
256 Fischer's exact t-test, we found that the gene composition of 14 mice modules (56%) was  
257 significantly enriched in human modules, indicating their strong conservation (Benjamini-  
258 Hochberg,  $p < 0.05$ ; **Fig.5a**; **Table S5**; see **Extended Data Fig.5f**; **Table S6** when including  
259 women). To identify which modules are most significantly impacted, we computed  
260 correlations between optogenetic activation or MDD, and each module's eigengene (a  
261 measure that summarizes co-expression). In humans, 12 module eigengenes significantly  
262 correlated with MDD; in mice, 6 modules associated with optogenetic stimulations (**Fig.5b**,  
263 **Extended Data Fig.5g**). Importantly, among these, 8/12 and 5/6 modules were also  
264 conserved across species. Therefore, human MDD and repeated optogenetic activation of  
265 the BLA-ACC pathway impact conserved gene modules in the ACC.

266 We then conducted ORA of disorganized and conserved gene modules. Enriched  
267 GO terms were related to synaptic activity, mitochondria or RNA processing (**Extended Data**  
268 **Table S7**), consistent with previous studies of MDD<sup>40-42</sup>. Importantly, the 2 most strongly  
269 conserved modules (Men/Yellow and Mouse/Brown) again implicated myelin, with  
270 enrichments related to oligodendrocytes and myelination (**Fig.5c**). To assess where myelin



271 genes are located within these modules, we analyzed their module membership (MM), a  
272 measure of module centrality. Myelin-related genes displayed higher absolute values (i.e.,  
273 higher centrality) compared to mean MM values among their host modules, in both species  
274 (**Fig.5d**). Among the 235 genes belonging to the intersection between the 2 Men/Yellow and  
275 Mouse/Brown modules, 36 were myelin related (**Fig.5e**, red dots), and a strong correlation  
276 between mouse and human MM was found, indicating that the same set of genes is centrally  
277 located among the 2 modules. Finally, we also observed a strong correlation in the  
278 directionality of gene expression changes across species, with a majority of down-regulated  
279 genes (**Fig.5f**). Altogether, myelination deficiency, a critical feature of MDD pathophysiology  
280 in the ACC, was indeed modelled by our optogenetic paradigm.

281 We next validated RNA-sequencing results using microfluidic qPCR and a new  
282 mouse cohort generated with the same optogenetic protocol (n=8 control and 7 stimulated  
283 mice). Behavioral effects of stimulations were first confirmed (**Fig.5g**), followed by dissection  
284 of the ACC tissue and analysis of the expression of most abundant myelin sheath proteins  
285 (*Plp1*, *Mal*, *Mog*, *Mag*, *Mbp*), enzymes involved in the synthesis of myelin lipids (*Aspa*, *Ugt8*),  
286 as well as positive (*Ernm*) and negative (*Sema4a*, *Lingo1*) regulators of myelination (**Fig.5h-**  
287 **i**). Results strongly correlated with RNA sequencing data, with similar down-regulation of  
288 myelin sheath proteins, or enzymes for the synthesis of myelin lipids, as well as up-  
289 regulation of 2 well-known negative regulators of myelination, *Sema4a* and *Lingo1*.

290 Finally, as complementary approaches to document how these profound myelin gene  
291 expression changes translate at cellular and network levels, we used immunohistochemistry  
292 and brain imaging. In a first cohort, we assessed, in the ACC, the number of cells expressing  
293 *Olig2*, a transcription factor essential for proliferation and differentiation in the  
294 oligodendrocyte lineage. After 9 sessions of optogenetic stimulation, when depressive-like  
295 consequences are maximal (**Fig.6a**), the number of *Olig2*-positive cells was significantly  
296 decreased (**Fig.6b-c**), likely contributing to the decreased expression of myelin genes  
297 observed in bulk tissue. In another cohort (for behavioral validation, see **Extended Data**  
298 **Fig.6a**), we performed MRI with DTI acquisition sequences, to analyze microstructural  
299 changes induced by optogenetic activation. Interestingly, stimulated animals displayed lower  
300 fractional anisotropy (FA) compared to controls in the ACC, amygdala and along the  
301 pathway connecting the two regions (**Fig.6d**). This effect significantly correlated with  
302 increased depressive-like behavior (**Extended Data Fig.6b** for behavioral validation). Since  
303 myelination is an important determinant of the structural connectivity assessed by DTI<sup>43,44</sup>,  
304 these results reinforce the notion that repeated activation of the BLA-ACC pathway disrupts  
305 the transcriptional program and cell proliferation within the ACC oligodendrocyte lineage,  
306 leading to altered connectivity between the 2 structures.

307

308 ***Sema4a* is necessary for the emergence of optogenetically-induced depressive-like**  
309 **states.** While the relationship between myelination and the expression of depressive-like  
310 behaviors has already been documented<sup>45-49</sup>, little is known about underlying molecular  
311 substrates. A few studies have investigated the effect of depleting myelin sheath protein<sup>50</sup> or  
312 positive regulator of myelination<sup>51</sup> on depressive-like behaviors in rodents. In contrast,  
313 upstream factors that prime myelin deficits and lead to behavioral dysregulation are  
314 unknown. Here, we focused on *Sema4a* because it is a potent inhibitor of myelination<sup>52,53</sup>  
315 that was recently associated with pathologies implicating white matter deficits<sup>54,55</sup>, and was  
316 strongly up-regulated in our optogenetic paradigm (**Fig.5i**).

317 To enable blocking the over-expression of *Sema4a* in our model, we first established  
318 a knock-down (KD) approach. Three different sh-RNAs (#108, 576, 791; **Fig.7a**) targeting  
319 exon 15 of *Sema4a* were designed, packed into AAV plasmids with mCherry reporter, and  
320 transfected in HEK cells over-expressing the targeted *Sema4a* exon, in fusion with eGFP.  
321 Among these, we prioritized shRNA-791 as it yielded the most profound KD, as shown by a  
322 near complete loss of eGFP signal at 2 days post-transfection (**Fig.7b**). To characterize *in*  
323 *vivo* efficiency of shRNA-791, it was then packaged into an AAV vector and injected in the  
324 ACC of adult mice, followed by qPCR quantification of *Sema4a* 6 weeks later (**Fig.7c-d**).  
325 Compared with a control vector expressing the mCherry and a scrambled shRNA, the AAV-  
326 shRNA-791 achieved a 62% reduction of *Sema4a* expression, demonstrating robust efficacy.

327 Finally, we hypothesized that knocking-down *Sema4a* prior to optogenetic  
328 stimulations may prevent the emergence of depressive-like behaviors. A new cohort of mice  
329 (**Fig.7e**) went through bilateral injections of the ChR2-expressing virus in the BLA, followed  
330 by bilateral injections of the AAV-shRNA-791 vector (or the Scrambled control) in the ACC,  
331 and, 2 weeks later, optogenetic cannula implantation in the ACC. Behavioral testing was  
332 performed after 9 stimulations over 3 weeks, corresponding to the 6-week time-point at  
333 which we documented shRNA-791 *in vivo* efficiency (**Fig.7d**). In this new cohort, no  
334 significant effect was observed in the ST (**Fig.7f**). In the FST (**Fig.7g**), we detected a  
335 significant interaction between optogenetic stimulations and *Sema4a* KD, with a potent  
336 increase in depressive-like behaviors of stimulated mice that did not occur when *Sema4a*  
337 was knocked-down. Analysis of emotional reactivity across ST and FST tests further  
338 strengthened these results, as global emotional dysfunction induced by BLA-ACC activation  
339 was reversed by *Sema4a* KD (**Fig.7h**). Of note, *Sema4a* KD had no effect in unstimulated  
340 mice across any tests, indicating that it is not sufficient to trigger emotional dysfunction in  
341 naive animals. Altogether, these results indicate that silencing *Sema4a* in the ACC prevents  
342 the emergence of emotional deficits when the BLA-ACC is repeatedly activated,  
343 demonstrating the critical role of this inhibitor of myelin function in mood control.

344

## 345 **Discussion**

346 Given the complexity of emotional consequences of chronic pain, disentangling the  
347 circuitries involved in its different components is crucial for uncovering new therapeutic leads  
348 and strategies. The ACC is considered to play a pivotal role in these processes<sup>10,30,56</sup>.  
349 However, while its connectome has been robustly established using neuroanatomical<sup>13,14</sup>  
350 and imaging approaches, how it integrates in polysynaptic neuronal circuits that may  
351 differentially regulate mood and nociception is poorly understood<sup>57</sup>. To address this gap,  
352 here we focused on the BLA-ACC pathway, based on their strong reciprocal anatomical  
353 connections and well-known functions. By leveraging 2 optogenetic strategies for neuronal  
354 activation or inhibition in the mouse, we manipulated ACC inputs coming from the BLA. Our  
355 translational results uncover a critical role of this discrete pathway in mood, both in the  
356 context of chronic pain or in the absence of any neuropathy.

357 First, we found that inhibiting the BLA-ACC pathway blocks the expression of depressive-like  
358 consequences of chronic pain, without affecting anxiety-like behaviors, aversiveness, or  
359 mechanical hypersensitivity. Because acute inhibition is sufficient to produce this effect,  
360 depressive-like features seem to be mediated by ongoing hyperactivity of the pathway. In  
361 contrast, our previous work had shown that inhibition of CamKIIa+ cells in the ACC,  
362 regardless of their connectivity features, attenuated both anxiety and depressive-like  
363 consequences of chronic pain<sup>11</sup>. This suggests that distinct ACC inputs differentially  
364 contribute to various aspects of the pain experience, which is coherent with data from other  
365 groups<sup>31,58</sup>. Accordingly, Gao et al showed that, in the sciatic nerve chronic constriction injury  
366 model, inhibiting projections from the ACC to the mesolimbic pathway (nucleus accumbens  
367 and ventral tegmental area) induces CPP, without affecting evoked pain<sup>31</sup>. In parallel,  
368 Hirschberg et al found that ACC inputs coming from the locus coeruleus (LC) are involved in  
369 anxiety-like and aversive consequences of pain<sup>58</sup>. Combined with ours, these results  
370 suggest functional segregation, with a LC-ACC-mesolimbic circuit preferentially involved in  
371 pain-induced aversion, while BLA and LC inputs targeting the ACC may predominantly  
372 mediate depressive- and anxiety-like consequences of chronic pain, respectively.

373 Second, we show that, in the absence of neuropathy, repeated but not acute BLA-  
374 ACC activation is sufficient to trigger depressive-like effects. The lack of detectable impact of  
375 this optogenetic manipulation on anxiety-like responses further strengthens the  
376 aforementioned notion that ACC inputs coming from the BLA selectively modulate mood  
377 states. This is also in line with our previous study showing that chronic but not acute  
378 activation of the whole ACC induces emotional deficits<sup>10,25</sup>. Thus, it is likely that the  
379 development of a depressive-like phenotype following BLA-ACC activation requires long-  
380 term molecular and neuronal plasticity, which we investigated using open-ended  
381 approaches, and compared with human MDD signature.

382           Based on convergent bioinformatic analyses (common DEG, RRHO2, GSEA,  
383 WGCNA), we found that transcriptomic changes occurring in our optogenetic paradigm  
384 recapitulated a series of adaptations that were previously associated with human MDD,  
385 notably affecting the mitochondria<sup>42,59</sup>, chromatin remodeling factors<sup>60</sup>, synaptic function,  
386 translational regulation<sup>42</sup> or myelination<sup>35,61</sup>. These results document the translational  
387 relevance of our paradigm. They also indicate that selective manipulation of a restricted  
388 neuronal pathway may represent a valuable strategy to model MDD, at both behavioral and  
389 molecular levels. Because recent studies suggest that the various mouse models available  
390 for this disorder may capture distinct aspects of its molecular pathophysiology<sup>42</sup>, we argue  
391 that our optogenetic model provides a complementary approach. While it is based on an  
392 artificially-induced neuronal hyperactivation, it appears to offer the possibility of modelling  
393 some of the effects of internal insults or states, such as chronic pain. Finally, this paradigm,  
394 and its potential extension to other neuronal circuits, also enables deciphering what is  
395 sufficient for the emergence of mood dysfunction.

396           Most widespread alterations affected oligodendrocytes and the myelination process,  
397 which were consistently identified across human and mouse data. Global down-regulation of  
398 myelin sheath proteins (*Plp1*, *Mal*, *Mog*, *Mbp*) and enzymes involved in the synthesis of  
399 myelin lipids (*Aspa*, *Ugt8*), as well as up-regulation of myelination inhibitors (*Lingo1*,  
400 *Sema4a*) were observed in the ACC of animals displaying depressive-like behaviors. These  
401 results are congruent with previous studies reporting deficits in myelination<sup>35,62</sup>, white matter  
402 tract organization<sup>63-65</sup> or oligodendrocytes integrity<sup>47,66</sup>, in the ACC of MDD patients. The  
403 crucial role of myelination in MDD pathophysiology is further supported by preclinical  
404 studies<sup>49,67,68</sup>. Depletion of the myelin sheath component CNP<sup>50</sup>, or of the positive regulator  
405 of myelination ErbB4<sup>51</sup>, as well as cellular depletion of oligodendrocyte progenitors<sup>70</sup>, have  
406 been shown to induce emotional dysfunction in rodents. Conversely, the pharmacological  
407 compound Clemastine, which enhances oligodendrocyte differentiation and myelination,  
408 exerts antidepressant-like effects in socially defeated<sup>68</sup> or isolated<sup>66</sup> mice. However,  
409 molecular mechanisms mediating such effects remain poorly characterized. Here, using  
410 gene network theory, we prioritized *Sema4a* as one of the most prominently upregulated  
411 genes in a myelin-enriched gene module strongly affected by BLA-ACC activation. Previous  
412 reports have shown that increased *Sema4a* function contributes to the broad and profound  
413 loss of mature oligodendrocytes and demyelination observed in neurological and auto-  
414 immune disorders, such as multiple sclerosis<sup>52-55,72</sup>. Our results extend these findings to a  
415 milder and more localized dysregulation of *Sema4a* signaling in the ACC, in the context of  
416 mood regulation. *Sema4a* knockdown in this region was sufficient to prevent the  
417 development of depressive-like behaviors induced by repeated activation of incoming BLA  
418 fibers. Therefore, we document a new role of *Sema4a*, whereby its optogenetically-driven

419 increased ACC expression plays a pivotal role in mood dysregulation. Altogether, these  
420 results point to *Sema4a* as a new potential preclinical target for depression.

421 In conclusion, these results demonstrate that the BLA-ACC pathway has a selective  
422 but essential role at the crossroad of chronic pain and depression. By combining animal and  
423 human studies, we define the behavioral relevance of this pathway, and uncover the  
424 essential role of impaired myelination and *Sema4a* signaling in depression.

425

426

## 427 **Acknowledgements**

428 This work was supported by the Centre National de la Recherche Scientifique (contract  
429 UPR3212), the University of Strasbourg, the Fondation pour la Recherche Médicale (FRM,  
430 FDT202012010622; FDT201805005527) (LJB, MH), the Fondation de France (FdF N°  
431 Engt:00081244; IY, PEL, RB, ECI), a NARSAD Young Investigator Grant from the Brain &  
432 Behavior Research Foundation (24736; IY), the French National Research Agency (ANR)  
433 through the Programme d'Investissement d'Avenir EURIDOL graduate school of pain ANR-  
434 17- EURE-0022 (LJB), ANR-18-CE37-0004 (IY), ANR-18-CE19-0006-03 (IY) and ANR-19-  
435 CE37-0010 (PEL), Hacettepe University Scientific Research Projects Coordination Unit  
436 (HUBAB), International Cooperation Project TBI-2018-17569 (BA), the Scientific and  
437 Technological Research Council of Turkey (TUBITAK) through international post-doctoral  
438 research fellowship program (BA), IdEx Young Investigator award (IY) and EU Erasmus  
439 Mundus Neurotime program (MK, IY, LH). The authors would also like to acknowledge the  
440 CAIUS High Performance Computing Center of the University of Strasbourg for providing  
441 scientific support and access to computing resources. Part of the computing resources was  
442 funded by the Equipex Equip@Meso project (Programme Investissements d'Avenir) and the  
443 CPER Alsacalcul/Big Data. We would like to thank Chronobiotron for animal care, Pascale  
444 Koebel and Paola Rossolillo from IGBMC for virus preparations, Jennifer Kaufling and  
445 Quentin Leboulleux for technical support, Violaine Alunni from IGBMC for the Fluidigm  
446 experiment and Daniel Almeida for English editing. Sequencing was performed by the  
447 GenomEast platform, a member of the 'France Génomique' consortium (ANR-10-INBS-  
448 0009).

449

450

## 451 **Authors contributions**

452 Behavioral experiments: *LJB, RW, CF, SHJ, MH, IY*; Molecular experiments: *LJB, IY*;  
453 Electrophysiological recordings: *SH*; Human data acquisition: *GT, PEL*; Imaging: *LJB, MK,*  
454 *LD MM, MNS, LAH*; Immunohistochemistry: *RW, BA, MB*; Neuroanatomy: *RW, CF, PV*;

455 Experimental design: *PEL, IY*; Data analyses: *LJB, RW, PH, BA, PEL, IY*; Fundings: *IY, PEL,*  
456 *ECI, RB*; Manuscript preparation: *LJB, RW, SH, LAH, PEL, IY*.

457

#### 458 **Competing interest**

459 The authors declare no competing financial interests.

460

#### 461 **Online methods**

462 **Animals.** *Experiments were conducted using male adult C57BL/6J (RRID: IMSR JAX:*  
463 *000664) mice (Charles River), 8 weeks old at the beginning of experimental procedures,*  
464 *group-housed with a maximum of 5 animals per cage and kept under a reversed 12 h*  
465 *light/dark cycle. After the optic fiber implantation, animals were single housed to avoid*  
466 *possible damage to the implant. We conducted all the behavioral tests during the dark phase,*  
467 *under red light. Our animal facility (Chronobiotron) is registered for animal experimentation*  
468 *(Agreement A67-2018-38), and protocols were approved by the local ethical committee of*  
469 *the University of Strasbourg (CREMEAS, APAFIS8183-2016121317103584).*

470

471 **Surgical procedures.** *Surgical procedures were performed under zoletil/xylazine*  
472 *anesthesia (zoletil 50mg/ml, xylazine 2.5mg/ml; ip, 4ml/kg, Centravet). For stereotaxic*  
473 *surgery, a local anesthetic was delivered subcutaneously at incision site (bupivacaine,*  
474 *2mg/kg).*

475

476 **Neuropathic pain induction: cuff surgery.** *For the BLA-ACC inhibition study, we used a*  
477 *well-characterized chronic pain-induced depression model<sup>11,23</sup>. Before surgery, mice were*  
478 *assigned to experimental groups so that these groups did not initially differ in mechanical*  
479 *nociceptive threshold or body-weight. Chronic neuropathic pain was induced by placing a*  
480 *2mm polyethylene tubing (Cuff, Harvard Apparatus, Les Ulis, France) around the right*  
481 *common branch of sciatic nerve<sup>24</sup>. The Sham group underwent the same procedure without*  
482 *cuff implantation.*

483

484 **Virus injection.** *After general anesthesia, mice were placed in a stereotaxic frame (Kopf*  
485 *Instruments). 0.5 $\mu$ l of AAV5-CaMKIIa-ChR2(H134R)-EYFP or AAV5CaMKIIa-eArchT3.0-*  
486 *EYFP (UNC Vector core) were injected bilaterally into the BLA using a 5 $\mu$ l Hamilton syringe*  
487 *(0.05 $\mu$ l/min, coordinates for the BLA, anteroposterior (AP): -1.4mm from bregma, lateral (L):*  
488 *+/-3.2mm, dorsoventral (DV): 4mm from the brain surface). The same method was used to*  
489 *bilaterally inject the rAAV-mCherry-scrambleUsh or the rAAV-mCherry-Sema4Ash791 into*  
490 *the ACC (coordinates: AP: +0.7mm, L: +/-0.2mm, DV: -2mm, from the bregma). After*  
491 *injection, the 32-gauge needle remained in place for 10min before being removed and then*

492 *the skin was sutured. Following surgery, animals were left undisturbed for at least two weeks*  
493 *before cannula implantation. To check viral injection localization at the end of the experiment,*  
494 *animals were anesthetized with Euthasol (182mg/kg) and perfused with 30mL of 0.1M*  
495 *phosphate buffer (PB, pH 7.4) followed by 100mL of 4% paraformaldehyde solution (PFA) in*  
496 *0.1M PB. Brains were extracted and post fixed overnight and kept at 4°C in 0.1M PB saline*  
497 *(PBS) until cutting. Coronal sections (40µm) were obtained using a vibratome (VT 1000S,*  
498 *Leica, Deerfield, IL) and were serially collected in PBS. Sections were serially mounted with*  
499 *Vectashield medium (Vector laboratories) and localization of the fluorescence was checked*  
500 *using an epifluorescence microscope (Nikon 80i, FITC filter). Only animals well-injected*  
501 *bilaterally in the BLA were kept for further analyses.*

502

503 **Tracer injections.** *Analysis of afferent neurons from the BLA to the ACC was performed by*  
504 *injecting the retrograde tracer Hydroxystilbamidine methanesulfonate (FluoroGold®, 0.5µl)*  
505 *bilaterally in the ACC, using a microsyringe pump controller (UMC4, World precision*  
506 *instruments) and a 5µl Hamilton syringe (100nl/min, coordinates for the ACC, AP: +0.7mm*  
507 *from bregma, L: +/-0.2mm, DV: -2mm from the bregma). 7 days after the tracer injection,*  
508 *mice were anesthetized with Euthasol (182mg/kg) and perfused with 30ml of 0.1M*  
509 *phosphate buffer (PB, pH 7.4) followed by 150ml of 4% paraformaldehyde solution (PFA) in*  
510 *0.1M PB. Brains were removed, postfixed overnight in PFA at 4°C, and then kept at 4°C in*  
511 *0.1M PB saline (PBS, pH 7.4) until cutting. Coronal sections (40µm) were obtained with a*  
512 *Vibratome (VT 1000S, Leica, Deerfield, IL) and serially collected in PBS.*

513

514 **Optic fiber cannula implantation.** *At least two weeks after virus injection, the animals*  
515 *underwent a unilateral optic fiber cannula implantation into the ACC. The optic fiber cannula*  
516 *was 1.7mm long and 220µm in diameter. The cannula was inserted 1.5mm deep in the brain*  
517 *at the following coordinates: AP: +0.7mm L: +/- 0.2mm (MFC 220/250–0.66 1.7mm RM3*  
518 *FLT, Doric Lenses)<sup>10</sup>. For behavioral experiments, cannulas were implanted in the left*  
519 *hemisphere in half of each experimental group, whereas the other half received the implant*  
520 *in the right hemisphere. For DTI protocol, all mice were implanted in the left hemisphere.*

521

522 **Optogenetic stimulation procedure.** *After 3 to 7 days of recovery, the BLA-ACC pathway*  
523 *was activated or inhibited by a blue light emitting diode (LED) with a peak wavelength of*  
524 *463nm (LEDFRJ-B FC, Doric Lenses) or a green light emitting laser with a peak wavelength*  
525 *of 520nm (Miniature Fiber Coupled Laser Diode Module, Doric Lenses) respectively. From*  
526 *the light source, the light travelled through the fiber optic patch cable (MFP 240/250/900-*  
527 *0.63 0.75m FC CM3, Doric Lenses) to the implant cannula. Blue light was delivered by*  
528 *pulses generated through a universal serial bus connected transistor-transistor logic pulse*

529 generator (OPTG 4, Doric Lenses) connected to a LED driver (LEDRV 2CH v.2, Doric  
530 Lenses). Transistor-transistor logic pulses were generated by an open-source software  
531 developed by Doric Lenses (USBTTL V1.9). Stimulated animals received repetitive  
532 stimulation sequences of 3s consisting of 2s at 10Hz with 10ms pulses and 1s without  
533 stimulation. The whole sequence is repeated during 20min each day for 3 consecutive days  
534 during 3 weeks. Light intensity was measured before implantation at the fiber tip using a  
535 photodetector (UNO, Gentec, Quebec, Canada) and was set between 3mW and 5mW.  
536 Green light was delivered in a continuous manner during 5min prior (Forced Swim Test and  
537 Dark/light test) or during behavioral testing (Splash test, Novelty Suppressed Feeding Test  
538 and von Frey test). The onset and end of stimulation were manually directed. Light intensity  
539 was measured as described above and set at 16mW. All control animals underwent the  
540 same procedure but the light remained switched off.

541

542 **Behavioral assessment. Nociception-related behavior.** The mechanical threshold of hind  
543 paw withdrawal was evaluated using von Frey hairs (Bioseb, Chaville, France)<sup>23</sup>. Mice were  
544 placed in clear Plexiglas® boxes (7x9x7cm) on an elevated mesh screen<sup>24</sup>. Filaments were  
545 applied to the plantar surface of each hind paw in a series of ascending forces (0.4 to 8g).  
546 Each filament was tested five times per paw, being applied until it just bent, and the  
547 threshold was defined as 3 or more withdrawals observed out of the 5 trials. All animals were  
548 tested before the cuff surgery to determine the basal threshold, every week after cuff surgery  
549 to ensure the development of mechanical allodynia and during optogenetic stimulation to  
550 assess the effect of the inhibition of the BLA-ACC on mechanical hypersensitivity.

551 Locomotor activity. Spontaneous locomotor activity was monitored for each experimental  
552 group. Mice were individually placed in activity cages (32x20cm floor area, 15cm high) with 7  
553 photocell beams. The number of beam breaks was recorded over 30min using Polyplace  
554 software (Imetronic, Pessac, France).

555 Real time place avoidance (RTA) and Conditioned Place Preference (CPP). The apparatus  
556 consists of 2 connected Plexiglas chambers (size 20cmx20cmx30 cm) distinguished by the  
557 wall patterns. On the first day (pre-test), animals are free to explore the apparatus during  
558 5min (CPP) or 10min (RTA), and the time spent in each chamber is measured to control for  
559 the lack of spontaneous preference for one compartment. Animals spending more than 75%  
560 or less than 25% of the total time in one chamber were excluded from the study. For RTA,  
561 the second day (test), animals are plugged to the light source placed between the 2  
562 chambers and let free to explore for 10min. Light is turned on when the mouse enters its  
563 head and forepaws in the stimulation paired chamber and turned off when it quit the  
564 compartment. Total time spent in the stimulation-paired chamber is measured. For CPP, on  
565 the second and third days (conditioning), animals are maintained during 5min in one



566 chamber, where optogenetic stimulation occurs, and 4h later placed during 5min in other  
567 chamber, without optogenetic stimulation. On the 4th day (test), the time spent in each  
568 chamber is recorded during 5min.

569

570 **Anxiodepressive-like behavioral assays.** Behavioral testing was performed during the  
571 dark phase, under red light. While each mouse went through different tests, they were never  
572 submitted to more than 2 tests per week, and never went through the same test twice. The  
573 forced swimming test (FST) was always considered as terminal. Body weights were  
574 measured weekly.

575 Dark-Light Box Test. The apparatus consisted of light and dark boxes (18x18x14.5 cm each).  
576 The lit compartment was brightly illuminated (1000lux). This test evaluates the conflict  
577 between the exploratory behavior of the rodent and the aversion created by bright light. Mice  
578 were placed in the dark compartment in the beginning of the test, and the time spent in the lit  
579 compartment was recorded during 5min<sup>10</sup>. For inhibition experiment, the test was performed  
580 immediately after the light stimulation.

581 Novelty suppressed feeding test. The apparatus consisted of a 40x40x30 cm plastic box with  
582 the floor covered with 2cm of sawdust. Twenty-four hours prior to the test, food was removed  
583 from the home cage. At the time of testing, a single pellet of food was placed on a paper in  
584 the center of the box. The animal was then placed in a corner of the box and the latency to  
585 eat the pellet was recorded within a 5min period. This test induces a conflict between the  
586 drive to eat the pellet and the fear of venturing in the center of the box<sup>73</sup>. For inhibition  
587 experiments, optogenetic stimulation was conducted during the test.

588 Splash Test. This test, based on grooming behavior, was performed as previously  
589 described<sup>23,73</sup>. Grooming duration was measured during 5min after spraying a 20% sucrose  
590 solution on the dorsal coat of the mouse. Grooming is an important aspect of rodent  
591 behavior and decreased grooming in this test is considered related to the loss of interest in  
592 performing self-oriented minor tasks<sup>74</sup>. For inhibition experiments, optogenetic stimulation  
593 was conducted during the test.

594 Nest Test. This test, based on a rodent innate behavior, was performed in cages identical to  
595 the home cages of animals. Each mouse was placed in a new cage with cotton square in the  
596 center. Water and food were provided ad libitum. After 5h, mice were placed back in their  
597 original cages and pictures of the constructed nest were taken. A score was given blindly to  
598 each nest as follows: 0 corresponds to an untouched cotton square, 1 to a cotton square  
599 partially shredded, 2 if the cotton is totally shredded but not organized, 3 if cotton is totally  
600 shredded and organized in the center of the cage, 4 if the cotton is totally shredded and  
601 shows a well-organized shape in the corner of the cage, like a nest<sup>75,76</sup>.

602 ***Forced Swim Test.*** *FST<sup>77</sup> was conducted by gently lowering the mouse into a glass cylinder*  
603 *(height 17.5cm, diameter 12.5cm) containing 11.5cm of water (23-25°C). Test duration was*  
604 *6min. The mouse was considered immobile when it floated in the water, in an upright*  
605 *position, and made only small movements to keep its head above water. Since little*  
606 *immobility was observed during the first 2min, the duration of immobility was quantified over*  
607 *the last 4min of the 6min test. Concerning inhibition experiments, the test was performed just*  
608 *after the stimulation.*

609

610 ***Ex vivo electrophysiological recordings.*** *We performed whole-cell patch clamp*  
611 *recordings of BLA neurons or ACC pyramidal neurons. In the BLA, we recorded from eYFP-*  
612 *expressing neurons of mice bilaterally injected with an AAV driving the expression of either*  
613 *the archaerhodopsin ArchT3.0 or the channelrhodopsin 2 under control of the CaMKIIa*  
614 *promoter (with AAV5-CaMKIIa-ArchT3.0-EYFP and AAV5-CaMKIIa-ChR2(H134R)-EYFP,*  
615 *respectively). In the ACC, we recorded from pyramidal neurons surrounded by eYFP-*  
616 *positive fibres. For these experiments, mice were anaesthetized with urethane (1.9g/kg) and*  
617 *killed by decapitation, their brain was removed and immediately immersed in cold (0°C-4°C)*  
618 *sucrose-based ACSF containing the following (in mM): 2 kynurenic acid, 248 sucrose, 11*  
619 *glucose, 26 NaHCO<sub>3</sub>, 2 KCl, 1.25 KH<sub>2</sub>PO<sub>4</sub>, 2 CaCl<sub>2</sub>, and 1.3 MgSO<sub>4</sub> (bubbled with 95% O<sub>2</sub>*  
620 *and 5% CO<sub>2</sub>). Transverse slices (300µm thick) were cut with a vibratome (VT1000S, Leica).*  
621 *Slices were maintained at room temperature in a chamber filled with ACSF containing the*  
622 *following (in mM): 126 NaCl, 26 NaHCO<sub>3</sub>, 2.5 KCl, 1.25 NaH<sub>2</sub>PO<sub>4</sub>, 2 CaCl<sub>2</sub>, 2 MgCl<sub>2</sub>, and 10*  
623 *glucose (bubbled with 95% O<sub>2</sub> and 5% CO<sub>2</sub>; pH 7.3; 310mOsm measured). Slices were*  
624 *transferred to a recording chamber and continuously superfused with ACSF saturated with*  
625 *95% O<sub>2</sub> and 5% CO<sub>2</sub>. BLA neurons expressing eYFP were recorded in the whole-cell patch-*  
626 *clamp configuration. Recording electrodes (3.5-4.5MΩ) were pulled from borosilicate glass*  
627 *capillaries (1.2mm inner diameter, 1.69mm outer diameter, Warner Instruments, Harvard*  
628 *Apparatus) using a P1000 electrode puller (Sutter Instruments). Recording electrodes were*  
629 *filled with, in mM: 140 KCl, 2 MgCl<sub>2</sub>, 10 HEPES, 2 MgATP; pH 7.3. The pH of intrapipette*  
630 *solutions was adjusted to 7.3 with KOH, and osmolarity to 310mOsm with sucrose. BLA or*  
631 *ACC were illuminated with the same system used for the in vivo experiments (see above)*  
632 *triggered with WinWCP 4.3.5, the optic fiber being localized in the recording chamber at*  
633 *3mm from the recorded neuron. The holding potential was fixed at -60mV. Recordings were*  
634 *acquired with WinWCP 4.3.5 (courtesy of Dr. J. Dempster, University of Strathclyde,*  
635 *Glasgow, United Kingdom). All recordings were performed at 34°C.*

636

637 ***MRI data acquisition.*** *Mouse brain resting state functional MRI scans were performed with*  
638 *a 7T Bruker BioSpec 70/30 USR animal scanner, a mouse head adapted room temperature*

639 surface coil combined with a volume transmission coil for the acquisition of the MRI signal  
640 and ParaVision software version 6.0.1 (Bruker, Ettlingen, Germany). Imaging was performed  
641 at baseline, 2 weeks and 8 weeks after peripheral nerve injury in the cuff model (Cuff  $n=7$   
642 and Sham  $n=7$ ). For rsfMRI the animals were briefly anesthetized with isoflurane for initial  
643 animal handling. The anesthesia was further switched to medetomidine sedation (MD,  
644 Domitor, Pfizer, Karlsruhe, Germany), initially induced by a subcutaneous (sc) bolus injection  
645 (0.15mg MD per kg body weight (kg bw) in 100 $\mu$ l 0.9% NaCl-solution). 10min later, the  
646 animals received a continuous sc infusion of MD through an MRI compatible catheter  
647 (0.3mg/kg bw/h) inserted at the mouse shoulder level. During the whole acquisition a 2mm  
648 thick agar gel (2% in NaCl) was applied on the mouse head to reduce any susceptibility  
649 artifacts arising at the coil/tissue interface. Respiration and body temperature were  
650 monitored throughout the imaging session. Acquisition parameters for rs-fMRI were: single  
651 shot GE-EPI sequence, 31 axial slices of 0.5mm thickness, FOV=2.12x1.8cm,  
652 matrix=147x59, TE/TR=15ms/2000ms, 500 image volumes, 0.14x0.23x0.5mm<sup>3</sup> resolution.  
653 Acquisition time was 16min. Morphological T2-weighted brain images (resolution of  
654 0.08x0.08x0.4mm<sup>3</sup>) were acquired with a RARE sequence using the following parameters:  
655 TE/TR=40ms/4591ms; 48 slices, 0.4mm slice thickness, interlaced sampling, RARE factor of  
656 8, 4 averages; an acquisition matrix of 256x256 and FOV of 2.12x2cm<sup>2</sup>. Brain Diffusion  
657 Tensor MRI (DT-MRI) acquisition in the BLA-ACC optogenetically stimulated animals was  
658 performed with the 7T animal scanner, but using a combination of a transmit – receive  
659 volume coil (86mm) and a mouse brain adapted loop surface coil allowing the passage of  
660 the optogenetic cannulas (MRI, Bruker, Germany). Stimulated animals ( $n=6$ ) and their  
661 controls ( $n=7$ ) were brain imaged under isoflurane anesthesia (1.5% for maintenance) using  
662 a 4-shot DTI-EPI sequence (TE/TR=24ms/3000ms), 8 averages; with diffusion gradients  
663 applied along 45 nonlinear directions, gradient duration  $[\delta]=5.6$ ms and gradient separation  
664  $[\Delta]=11.3$ ms and a b-factor of 1000s/mm<sup>2</sup>. Images with a b-factor=0s/mm<sup>2</sup> were also  
665 acquired. 30 axial slices with 0.5mm thickness were acquired covering the whole brain with a  
666 FOV of 1.9x1.6cm<sup>2</sup> and an acquisition matrix of 190x160 resulting in an image resolution of  
667 0.1x0.1x0.5mm<sup>3</sup>. The total acquisition time was of 1h20min.

668

669 **MRI data processing.** Rs-fMRI images were spatially normalized into a template using  
670 Advanced Normalization Tools (ANTs) software<sup>78</sup> using SyN algorithm and smoothed  
671 (FWHM=0.28x0.46x1mm<sup>3</sup>) with SPM8. Seed-based functional connectivity analysis was  
672 performed with a MATLAB tool developed in-house. Regions of interest (ROI) were  
673 extracted from Allen Mouse Brain Atlas<sup>37</sup> which were later normalized into the template  
674 space. Resting-state time series were de-trended, band-pass filtered (0.01-0.1Hz) and

675 regressed for cerebrospinal fluid signal from the ventricles. Principal component analysis  
676 (PCA) of the BOLD time courses across voxels within a given ROI was performed and first  
677 principal component accounting for the largest variability was selected as the representative  
678 time course for further analysis. Spearman correlations between the PCA time course of  
679 single ROIs and each voxel of the brain was computed at the group and individual levels and  
680  $r$  values were converted to  $z$  using Fisher's  $r$ -to- $z$  transformation. Individual connectivity  
681 maps for baseline rs-fMRI acquisitions were subtracted from 2 and 8 PO weeks counterparts  
682 for each subject. Baseline subtracted connectivity maps were subsequently used for two  
683 sample  $t$ -test with SPM8 to perform group comparison. Family-wise error rate (FWER)  
684 correction was applied at the cluster level ( $p < 0.05$ ) for each statistical image. Preprocessing  
685 of diffusion weighted images included denoising<sup>79</sup>, removal of Gibbs ringing artifacts<sup>80</sup>,  
686 motion correction<sup>81</sup>, and bias field inhomogeneity correction<sup>82</sup>. Diffusion tensor was  
687 estimated<sup>83</sup> using weighted least-squares (WLS) approach and the following tensor-derived  
688 parameters were computed: fractional anisotropy (FA), axial diffusivity (AD), mean diffusivity  
689 (MD) and radial diffusivity (RD). All these processing steps were done using MRtrix3  
690 (<https://www.mrtrix.org>); except the motion correction step, done using Advanced  
691 Normalisation Tools (ANTs, <http://stnava.github.io/ANTs/>). Based on  $b=0$ s/mm<sup>2</sup> images (i.e.,  
692 the volume without diffusion weighting), these images were then spatially registered in a  
693 common space using the SyN registration method of ANTs to build a study-specific template,  
694 which was then affinely registered onto the Allen Brain Atlas template. Each mouse tensor-  
695 derived maps were finally warped in this common space. These registered images were  
696 finally smoothed by a 0.5mm full-width half maximum (FWHM) Gaussian kernel. Inter-group  
697 differences for all the DTI derived parameters were assessed using the SPM12 General  
698 Linear Model (GLM). The results were analyzed according to a level of statistical significance,  
699  $p < 0.001$  without correction. Further, correlational analyses were performed between the DTI  
700 metrics (voxel level) and the results from splash tests (statistical significance was  $p < 0.001$ ,  
701 uncorrected).

702

703 **Immunohistochemistry.** c-Fos immunoperoxidase: Animals were stimulated once with the  
704 same procedure as described before (for BLA-ACC activation). 90min later, animals were  
705 anesthetized with Euthasol (182mg/kg) and perfused with 30ml of 0.1M PB (pH 7.4) followed  
706 by 100ml of 4% PFA in 0.1M PB. Brains were removed, post fixed overnight and kept at 4°C  
707 in 0.1M PBS (pH 7.4) until cutting. Coronal sections (40µm) were obtained using a vibratome  
708 (VT 1000S, Leica, Deerfield, IL) and were serially collected in PBS. Sections were incubated  
709 15min in a 1% H<sub>2</sub>O<sub>2</sub>/50% ethanol solution and washed in PBS (3x10 min). Sections were  
710 then pre-incubated in PBS containing Triton X-100 (0.3%) and donkey serum (5%) for 45min.  
711 Sections were then incubated overnight at room temperature in PBS containing Triton X-100

712 (0.3%), donkey serum (1%) and rabbit anti-c-Fos (1:10000, Santa Cruz Biotechnology,  
713 E1008). Sections were then washed in PBS (3x10min), incubated with biotinylated donkey  
714 anti-rabbit secondary antibody (1:300) in PBS containing Triton X-100 (0.3%), donkey serum  
715 (1%) for 2h and washed in PBS (3x10min). Sections were incubated with PBS containing the  
716 avidin-biotin-peroxidase complex (ABC kit; 0.2% A and 0.2% B; Vector laboratories) for  
717 90min. After being washed in Tris-HCl buffer, sections were incubated in  
718 3,3'-diaminobenzidine tetrahydrochloride (DAB) and H<sub>2</sub>O<sub>2</sub> in Tris-HCl for approximately 4min  
719 and washed again. Sections were serially mounted on gelatin-coated slides, air dried,  
720 dehydrated in graded alcohols, cleared in Roti-Histol (Carl Roth, Karlsruhe, Germany) and  
721 coverslipped with Eukitt. c-Fos immunohistochemistry then allowed controlling for both the  
722 implant location and the activation of the ACC by the optogenetic procedure. Animals having  
723 c-Fos induction outside of the ACC, for instance in the motor cortex, were excluded from  
724 analysis.

725 c-Fos immunofluorescence: Animals were anesthetized with Euthasol (182mg/kg) and  
726 perfused with 30ml of 0.1M PB (pH 7.4) followed by 100ml of 4% PFA in 0.1M PB. Brains  
727 were removed, postfixed overnight and kept at 4°C in 0.1M PBS (pH 7.4) until cutting.  
728 Coronal sections (40µm) were obtained using a vibratome (VT 1000S) and were serially  
729 collected in PBS. Sections were washed in PBS (3x10min) and pre-incubated in PBS  
730 containing Triton X-100 (0.3%) and donkey serum (5%) for 45min. Sections were then  
731 incubated overnight at room temperature in PBS containing Triton X-100 (0.3%), donkey  
732 serum (1%) and rabbit anti-c-Fos (1:1000, Synaptic System, 226-003). Sections were then  
733 washed in PBS (3x10min), incubated with Alexa fluor 594 donkey anti-rabbit secondary  
734 antibody (1:400) in PBS containing Triton X-100 (0.3%), donkey serum (1%) for 2h and  
735 washed in PBS (3x10min). Sections were finally serially mounted with vectashield medium  
736 (Vector laboratories).

737

738 **Fluorogold and cFos quantification.** Single-layer images were acquired using a laser-  
739 scanning microscope (confocal Leica SP5 Leica Microsystems CMS GmbH) equipped with  
740 x20 objective. Excitation wavelengths were sequentially diode 405nm, argon laser 488nm  
741 and diode 561nm. Emission bandwidths are 550-665nm for Fluorogold fluorescence and  
742 710-760nm for Alexa594 signal. Segmentation and classification of c-Fos positive cells was  
743 performed from 3 sections for each animal using a deep learning model. The model was  
744 trained from scratch for 400 epochs on 10 paired image patches (image dimensions:  
745 (160,160), patch size: (160,160)) with a batch size of 2 and a mae loss function, using the  
746 StarDist 2D ZeroCostDL4Micnotebook (v 1.11)<sup>84</sup>. Key python packages used include  
747 tensorflow (v 0.1.12), Keras (v 2.3.1), csbdeep (v 0.6.2), numpy (v 1.19.5), cuda (v 11.0.221).  
748 The training was accelerated using a Tesla K80 GPU and dataset was augmented by a

749 factor of 4. Segmentation and classification of Fluorogold signal was done using Stardist  
750 2D\_versatile\_fluo<sup>85,86</sup> pre-trained model. Fluorogold masks and c-fos masks were then  
751 overlaid to count the double positive cells using Fiji<sup>87</sup>.

752

753 **RNAscope.** Brain samples were immersed in isopentane and immediately placed at -80°C.  
754 Frozen samples were embedded in OCT compound and 14µm thick sections were  
755 performed on cryostat, mounted on slides and put back in -80°C freezer. Sections were fixed,  
756 dehydrated and pre-treated using the “RNAscope Sample Preparation and Pre-treatment  
757 Guide for Fresh Frozen Tissue using RNAscope Fluorescent Multiplex Assay” protocol  
758 (Advanced Cell Diagnostics). Hybridation of Slc17a7 (ACD, 416631), Gad2 (ACD, 415071-  
759 C2) and c-fos (ACD, 316921) probes and development of the different signals with Opal 520,  
760 590 and 690 fluorophores were performed in accordance with the “RNAscope Multiplex  
761 Fluorescent Reagent Kit v2 Assay” instructions (Advanced Cell Diagnostics). Single-layer  
762 images were acquired using a laser-scanning nanozoomer (S60; Hamamatsu Photonics) at  
763 40X magnification. Quantifications were performed from two sections for each animal on  
764 QuPath 0.3.0 software<sup>88</sup>. First, region of interest were drawn using the polygon annotation  
765 tool. Then nuclei were detected within regions of interest using the cell detection module on  
766 the Dapi staining. To determine the c-fos, Gad2 and Slc17a7 positive cells on our regions of  
767 interest, object classifiers were trained in Qupath using Random trees classifiers. We  
768 selected all the features by output class (Nucleus mean, Nucleus sum, Nucleus standard  
769 deviation, Nucleus maximum, Nucleus minimum, Nucleus range, Cell mean, Cell standard  
770 deviation, Cell maximum, Cell minimum, Cytoplasm mean, Cytoplasm standard deviation,  
771 Cytoplasm maximum, Cytoplasm minimum), and annotated manually a minimum of 20  
772 points for positive cells and negative cells. Classifiers were then applied sequentially on the  
773 whole region of interest to determine the c-fos, Gad2 and Slc17a7 positive cells.

774

775 **RNA extraction.** Two different batches of animals were generated for RNA-sequencing, with  
776 a third one for Fluidigm validation of RNA-sequencing results. Bilateral ACC was freshly  
777 dissected from animals killed by cervical dislocation and tissues were stored at -80°C. Total  
778 RNA was extracted from ACC tissue with the Qiagen RNeasy Mini Kit (Hilden Germany).  
779 Around 20mg of ACC tissue was disrupted and homogenized with a Kinematica Polytron  
780 1600E in 1.2ml QIAzol Lysis reagent, for 30s, and then left at room temperature for 5min.  
781 Next, 240µl of chloroform was added and mixed before centrifugation for 15min at  
782 12,000rpm at 4°C. The aqueous phase (600µl) was transferred to a new collection tube and  
783 mixed with 600µl of 70% ethanol. The mix was transferred into a RNeasy spin column in a  
784 2ml collection tube, and centrifuged at 10,000rpm for 15s. Next, 350µl of RW1 buffer was  
785 added and centrifuged at 10,000rpm, for 15s, before adding 10µl of DNase and 70µl of RDD

786 *buffer. The mix was left at room temperature for 15min and 350µl of RW1 buffer was added*  
787 *and centrifuged at 10,000rpm for 15s. The column was then transferred to a new 2ml*  
788 *collection tube and washed with 500µl of RPE buffer, before being centrifuged at 10,000rpm.*  
789 *Finally, the column was dry centrifuged at 10,000rpm for 5min, and transferred to a new*  
790 *1.5ml collection tube to which 18µl of RNase-free water was added. Finally, the RNA was*  
791 *eluted by centrifugation for 1min at 10,000rpm. Samples were kept at -80°C until use.*

792

793 **Mouse RNA-sequencing.** *RNA-sequencing was performed by the Genomeast platform at*  
794 *IGBMC. Full length cDNAs were generated from 5ng of total RNA using the Clontech*  
795 *SMARTSeq v4 Ultra Low Input RNA kit for Sequencing (PN 091817, Takara Bio Europe,*  
796 *Saint-Germain-en-Laye, France) according to manufacturer's instructions, with 10 cycles of*  
797 *PCR for cDNA amplification by Seq-Amp polymerase. Six hundred pg of pre-amplified cDNA*  
798 *were then used as input for Tn5 transposon tagmentation by the Nextera XT DNA Library*  
799 *Preparation Kit (PN 15031942, Illumina, San Diego, CA), followed by 12 PCR cycles of*  
800 *library amplification. Following purification with Agencourt AMPure XP beads*  
801 *(BeckmanCoulter, Villepinte, France), the size and concentration of libraries were assessed*  
802 *by capillary electrophoresis. Libraries were then sequenced using an Illumina HiSeq 4000*  
803 *system using single-end 50bp reads. Reads were mapped onto the mm10 assembly of the*  
804 *Mus musculus genome, using STAR version 2.5.3a<sup>89</sup>. Gene expression quantification was*  
805 *performed from uniquely aligned reads using htseq-count<sup>90</sup> version 0.6.1p1, with annotations*  
806 *from Ensembl version 95. Read counts were then normalized across samples with the*  
807 *median-of-ratios method proposed by Anders and Huber<sup>91</sup>, to make these counts*  
808 *comparable between samples. Principal Component Analysis was computed on regularized*  
809 *logarithm transformed data calculated with the method proposed by Love and collaborators<sup>92</sup>.*  
810 *Differential expression analysis was performed using R and the Bioconductor package*  
811 *DESeq2 version 1.22.1<sup>92</sup>, using RIN values and batches as covariates. Because we*  
812 *generated two batches of mice, the lfcShrink function was used instead of betaPrior in order*  
813 *to calculate p-values from the log2 Fold-changes unshrunked and to perform the shrinkage*  
814 *afterwards. RIN and sample batches can be found in **Extended Data Table2**.*

815

816 **Human RNA-Sequencing data.** *Human gene expression data, obtained from our previous*  
817 *publication<sup>35</sup> (archived on GEO Datasets under the reference series: "GSE151827" samples:*  
818 *GSM5026548-97), were generated initially using post-mortem ACC tissue from the Douglas-*  
819 *Bell Canada Brain Bank. This cohort was composed of 26 subjects who died by suicide*  
820 *during a major depressive episode, and 24 psychiatrically healthy controls. Groups were*  
821 *matched for age, post-mortem interval and brain pH, and include both male (19 in control*  
822 *group and 19 in MDD group) and female (5 in control group, 7 in MDD group) subjects.*

823 *Demographics for the cohort can be found in **Extended Data Table2**. While differential*  
824 *expression analysis for the whole cohort (both males and females) was reported previously<sup>35</sup>,*  
825 *during the present work we reprocessed raw gene counts from male individuals only, and*  
826 *conducted a new differential expression analysis to compare men with MDD and men*  
827 *healthy control, taking into account RIN, and age, as in<sup>35</sup>.*

828

829 **Rank-rank hypergeometric overlap (RRHO) analysis.** *In order to compare mouse and*  
830 *human RNA-Sequencing data, we used the Rank-rank hypergeometric overlap (RRHO2)*  
831 *procedure, as described by Cahill et al<sup>86</sup>, using the R package available at:*  
832 *<https://github.com/Caleb-Huo/RRHO2>. Mice-human orthologous genes were first obtained*  
833 *using the R package BioMart, leaving a total of 13572 genes. Genes in each data set were*  
834 *ranked based on the following metric:  $-\log_{10}(p\text{-value}) \times \text{sign}(\log_2 \text{Fold Change})$ . Then, the*  
835 *RRHO2 function was applied to the 2 gene lists at default parameters (with stepsize equal to*  
836 *the square root of the list length). Significance of hypergeometric overlaps between human*  
837 *and mouse gene expression changes are reported as  $\log_{10}$  p-values, corrected using the*  
838 *Benjamini–Yekutieli procedure.*

839

840 **Gene Set Enrichment Analysis (GSEA).** *Mouse and men genes were ranked*  
841 *independently based on the fold changes obtained from their respective differential*  
842 *expression analysis. GSEA was performed as previously described<sup>83</sup> using the he*  
843 *GSEAPreranked tool and the Lein Oligodendrocyte markers gene set.*

844

845 **Weighted Gene Coexpression Network Analysis (WGCNA).** *WGCNA<sup>38</sup> was used to*  
846 *construct gene networks in mice and human using RNA-seq expression data and then*  
847 *identify conserved gene modules between the two species. The RNA-sequencing*  
848 *expression data were normalized for batch and RIN in mice; and for age, ethnic origin and*  
849 *RIN in human (with sex included when analyzing the whole cohort). First, a soft-threshold*  
850 *power was defined (mouse: 4, human: 8) to reach a degree of independence superior to 0.8*  
851 *and thus ensure the scale-free topology of the network. To construct the network and detect*  
852 *modules, the `blockwiseModules` function of the WGCNA algorithm was used, with the*  
853 *minimum size of modules set at 30 genes. Then, the eigengene of each module was*  
854 *correlated with our traits of interest (optogenetic stimulation of the BLA-ACC pathway in mice,*  
855 *or MDD in human) and gene significance (GS), defined as the correlation between each*  
856 *individual gene and trait, was calculated. Inside each module a measure of the correlation*  
857 *between the module eigengene and the gene expression profile, or module membership*  
858 *(MM), was also assessed. Conservation of WGCNA module across mice and human was*  
859 *assessed by Fisher's exact test. Modules were considered as significantly overlapping, and*



860 therefore conserved, when  $p_{adj} < 0.05$ . Among the modules displaying a significant overlap  
861 between human and mice, only those with a significant ( $p_{adj} < 0.1$ ) association between the  
862 module eigengene and trait, in both species, were kept for further analysis.

863

864 **Gene Ontology.** Enrichment for functional terms in DEGs in human MDD and mice was  
865 performed using WEBGSTALL for biological process, cellular component and molecular  
866 function<sup>34</sup>. Analysis was restricted to the genes differentially expressed at  $nom-p < 0.05$ . The  
867 same procedure was applied to the list of genes changed in the same direction in mice and  
868 human obtained by RRHO without regards on the  $p$ -value.

869

870 **Fluidigm.** cDNA was generated by subjecting 50ng of RNA from each sample to reverse  
871 transcriptase reaction (Reverse Transcription Master Mix Kit Fluidigm P/N-100-6297). Then,  
872 1.25 $\mu$ L of each cDNA solution was used to generate a preamp mix containing a pooled of  
873 the 26 primers pairs and the PreAmp Master Mix Kit (Fluidigm P/N 100-5744). Preamp  
874 mixes were run for 14 cycles and the remaining primers were digested with Exonuclease I  
875 (New England BIOLAB. P/N M0293I. LOT 0191410). Preamp samples were analyzed for the  
876 expression of 22 genes of interest (for primer sequences see **Extended data TableS8**)  
877 using the BioMark qPCR platform (Fluidigm, San Francisco, CA, USA). Data were  
878 normalized to *Gadph*, *B2m*, *Actb* and *Gusb* (from the same animal) and fold changes were  
879 calculated using the  $2^{-\Delta\Delta Ct}$  method<sup>64</sup>.

880

881 **Plasmid construction.** For the expression of shRNAs, long oligonucleotide linkers were  
882 designed containing the *HindIII* and *BglIII* restriction sites at the 5' and 3' extremities  
883 respectively. Each linker contained the loop TTCAAGAGA separating a forward and a  
884 reverse copy of the following shRNA sequences: GGAAGAGCCAGACAGGTTTCT for  
885 mouse *Sema4A* exon15, GCCACAACGTCTATATCATGG for eGFP and  
886 GCGCTTAGCTGTAGGATTC for a universal scramble. Linkers were cloned by  
887 restriction/ligation downstream the mouse U6 promoter into the pAAV-CMV-mCherry-mU6  
888 construct derived from pAAV-MCS (Agilent). For the construction of the plasmid for the sh  
889 efficiency testing in cells, the *Sema4A* exon 15 was amplified from C57Bl/6 embryonic stem  
890 cell genomic DNA and cloned at the C-terminal end of eGFP into pEGFP-C1 by SLIC using  
891 the following primers:

892 GTACAAGTCCGGACTCAGATCTCGAGCTATTAAGAAGTCCTGACAGTCCC

893 and GATCAGTTATCTAGATCCGGTGGATCCTTAAGCCACTTCGGCGCC.

894

895 **AAV production.** Recombinant adeno-associated virus AAV serotype 5 (AAV5) were  
896 generated by a triple transfection of HEK293T-derived cell line using Polyethylenimine (PEI)

897 *transfection reagent and the 3 following plasmids: pAAV-CMV-mCherry-mU6-shRNA, pXR5*  
898 *(deposited by Dr Samulski, UNC Vector Core) encoding the AAV serotype 5 capsid and*  
899 *pHelper (Agilent) encoding the adenovirus helper functions. 48h after transfection, AAV5*  
900 *vectors were harvested from cell lysate treated with Benzonase (Merck) at 120U/mL. They*  
901 *were further purified by gradient ultracentrifugation with Iodixanol (Optiprep™ density*  
902 *gradient medium) followed by dialysis and concentration against Dulbecco's PBS using*  
903 *centrifugal filters (Amicon Ultra-15 Centrifugal Filter Devices 100K, Millipore). Viral titers*  
904 *were quantified by Real-Time PCR using the LightCycler480 SYBR Green I Master (Roche)*  
905 *and primers targeting mCherry sequence. Titters are expressed as genome copy per milliliter*  
906 *(GC/mL).*

907

908 **Statistical analyses.** *Statistical analyses were performed in GraphPad Prism v9.0 software.*  
909 *Data are expressed as mean±SEM, with statistical significance set as \*p<0.05, \*\*p<0.01,*  
910 *\*\*\*p<0.001. Student's t-test (paired and unpaired), One-Way Analysis of Variance (ANOVA),*  
911 *One-Way Repeated Measures ANOVA, and Two-way ANOVA followed by Newman-Keuls*  
912 *post hoc test were used when appropriate. If data failed the Shapiro-Wilk normality test,*  
913 *Mann-Whitney non-parametric (one- or two-tailed) analysis was used.*

914

## 915 Bibliography

916

- 917 1. Bair, M. J., Robinson, R. L., Katon, W. & Kroenke, K. Depression and pain comorbidity:  
918 a literature review. *Arch. Intern. Med.* **163**, 2433–2445 (2003).
- 919 2. Rayner, L. *et al.* Depression in patients with chronic pain attending a specialised pain  
920 treatment centre: prevalence and impact on health care costs. *Pain* **157**, 1472–1479  
921 (2016).
- 922 3. Arnow, B. A. *et al.* Comorbid depression, chronic pain, and disability in primary care.  
923 *Psychosom. Med.* **68**, 262–268 (2006).
- 924 4. Gallagher, R. M. & Verma, S. Managing pain and comorbid depression: A public health  
925 challenge. *Semin. Clin. Neuropsychiatry* **4**, 203–220 (1999).
- 926 5. Thompson, J. M. & Neugebauer, V. Cortico-limbic pain mechanisms. *Neurosci. Lett.*  
927 **702**, 15–23 (2019).
- 928 6. Apkarian, A. V., Bushnell, M. C., Treede, R.-D. & Zubieta, J.-K. Human brain  
929 mechanisms of pain perception and regulation in health and disease. *Eur. J. Pain Lond.*  
930 *Engl.* **9**, 463–484 (2005).
- 931 7. Drevets, W. C., Savitz, J. & Trimble, M. The subgenual anterior cingulate cortex in mood  
932 disorders. *CNS Spectr.* **13**, 663–681 (2008).
- 933 8. Kummer, K. K., Mitrić, M., Kalpachidou, T. & Kress, M. The Medial Prefrontal Cortex as  
934 a Central Hub for Mental Comorbidities Associated with Chronic Pain. *Int. J. Mol. Sci.*  
935 **21**, E3440 (2020).
- 936 9. Xiao, C. *et al.* Early molecular alterations in anterior cingulate cortex and hippocampus  
937 in a rodent model of neuropathic pain. *Brain Res. Bull.* **166**, 82–91 (2021).
- 938 10. Barthas, F. *et al.* The anterior cingulate cortex is a critical hub for pain-induced  
939 depression. *Biol. Psychiatry* **77**, 236–245 (2015).
- 940 11. Sellmeijer, J. *et al.* Hyperactivity of Anterior Cingulate Cortex Areas 24a/24b Drives  
941 Chronic Pain-Induced Anxiodepressive-like Consequences. *J. Neurosci. Off. J. Soc.*  
942 *Neurosci.* **38**, 3102–3115 (2018).
- 943 12. LeDoux, J. E. & Brown, R. A higher-order theory of emotional consciousness. *Proc. Natl.*  
944 *Acad. Sci. U. S. A.* **114**, E2016–E2025 (2017).
- 945 13. Fillinger, C., Yalcin, I., Barrot, M. & Veinante, P. Afferents to anterior cingulate areas 24a  
946 and 24b and midcingulate areas 24a' and 24b' in the mouse. *Brain Struct. Funct.* **222**,  
947 1509–1532 (2017).
- 948 14. Fillinger, C., Yalcin, I., Barrot, M. & Veinante, P. Efferents of anterior cingulate areas 24a  
949 and 24b and midcingulate areas 24a' and 24b' in the mouse. *Brain Struct. Funct.* **223**,  
950 1747–1778 (2018).
- 951 15. Kesner, R. P., Walser, R. D. & Winzenried, G. Central but not basolateral amygdala  
952 mediates memory for positive affective experiences. *Behav. Brain Res.* **33**, 189–195  
953 (1989).
- 954 16. Namburi, P. *et al.* A circuit mechanism for differentiating positive and negative  
955 associations. *Nature* **520**, 675–678 (2015).
- 956 17. Veinante, P., Yalcin, I. & Barrot, M. The amygdala between sensation and affect: a role  
957 in pain. *J. Mol. Psychiatry* **1**, 9 (2013).
- 958 18. Drevets, W. C. Neuroimaging abnormalities in the amygdala in mood disorders. *Ann. N.*  
959 *Y. Acad. Sci.* **985**, 420–444 (2003).
- 960 19. Simons, L. E. *et al.* The human amygdala and pain: evidence from neuroimaging. *Hum.*  
961 *Brain Mapp.* **35**, 527–538 (2014).
- 962 20. Åhrlund-Richter, S. *et al.* A whole-brain atlas of monosynaptic input targeting four  
963 different cell types in the medial prefrontal cortex of the mouse. *Nat. Neurosci.* **22**, 657–  
964 668 (2019).
- 965 21. Hintiryan, H. *et al.* Connectivity characterization of the mouse basolateral amygdalar  
966 complex. *Nat. Commun.* **12**, 2859 (2021).
- 967 22. Zhuo, M. Neural Mechanisms Underlying Anxiety-Chronic Pain Interactions. *Trends*  
968 *Neurosci.* **39**, 136–145 (2016).

- 969 23. Yalcin, I. *et al.* A time-dependent history of mood disorders in a murine model of  
970 neuropathic pain. *Biol. Psychiatry* **70**, 946–953 (2011).
- 971 24. Yalcin, I. *et al.* The sciatic nerve cuffing model of neuropathic pain in mice. *J. Vis. Exp.*  
972 *JoVE* (2014) doi:10.3791/51608.
- 973 25. Barthas, F. *et al.* Cingulate Overexpression of Mitogen-Activated Protein Kinase  
974 Phosphatase-1 as a Key Factor for Depression. *Biol. Psychiatry* **82**, 370–379 (2017).
- 975 26. Allen, H. N., Bobnar, H. J. & Kolber, B. J. Left and right hemispheric lateralization of the  
976 amygdala in pain. *Prog. Neurobiol.* **196**, 101891 (2021).
- 977 27. Ji, G. & Neugebauer, V. Hemispheric lateralization of pain processing by amygdala  
978 neurons. *J. Neurophysiol.* **102**, 2253–2264 (2009).
- 979 28. Johansen, J. P., Fields, H. L. & Manning, B. H. The affective component of pain in  
980 rodents: direct evidence for a contribution of the anterior cingulate cortex. *Proc. Natl.*  
981 *Acad. Sci. U. S. A.* **98**, 8077–8082 (2001).
- 982 29. LaGraize, S. C., Labuda, C. J., Rutledge, M. A., Jackson, R. L. & Fuchs, P. N.  
983 Differential effect of anterior cingulate cortex lesion on mechanical hypersensitivity and  
984 escape/avoidance behavior in an animal model of neuropathic pain. *Exp. Neurol.* **188**,  
985 139–148 (2004).
- 986 30. Qu, C. *et al.* Lesion of the rostral anterior cingulate cortex eliminates the aversiveness of  
987 spontaneous neuropathic pain following partial or complete axotomy. *Pain* **152**, 1641–  
988 1648 (2011).
- 989 31. Gao, S.-H. *et al.* The projections from the anterior cingulate cortex to the nucleus  
990 accumbens and ventral tegmental area contribute to neuropathic pain-evoked aversion  
991 in rats. *Neurobiol. Dis.* **140**, 104862 (2020).
- 992 32. Guilloux, J.-P., Seney, M., Edgar, N. & Sibille, E. Integrated behavioral z-scoring  
993 increases the sensitivity and reliability of behavioral phenotyping in mice: relevance to  
994 emotionality and sex. *J. Neurosci. Methods* **197**, 21–31 (2011).
- 995 33. Kremer, M. *et al.* A Dual Noradrenergic Mechanism for the Relief of Neuropathic  
996 Allodynia by the Antidepressant Drugs Duloxetine and Amitriptyline. *J. Neurosci. Off. J.*  
997 *Soc. Neurosci.* **38**, 9934–9954 (2018).
- 998 34. Liao, Y., Wang, J., Jaehnig, E. J., Shi, Z. & Zhang, B. WebGestalt 2019: gene set  
999 analysis toolkit with revamped UIs and APIs. *Nucleic Acids Res.* **47**, W199–W205  
1000 (2019).
- 1001 35. Lutz, P.-E. *et al.* Association of a History of Child Abuse With Impaired Myelination in the  
1002 Anterior Cingulate Cortex: Convergent Epigenetic, Transcriptional, and Morphological  
1003 Evidence. *Am. J. Psychiatry* **174**, 1185–1194 (2017).
- 1004 36. Cahill, K. M., Huo, Z., Tseng, G. C., Logan, R. W. & Seney, M. L. Improved identification  
1005 of concordant and discordant gene expression signatures using an updated rank-rank  
1006 hypergeometric overlap approach. *Sci. Rep.* **8**, 9588 (2018).
- 1007 37. Lein, E. S. *et al.* Genome-wide atlas of gene expression in the adult mouse brain. *Nature*  
1008 **445**, 168–176 (2007).
- 1009 38. Langfelder, P. & Horvath, S. WGCNA: an R package for weighted correlation network  
1010 analysis. *BMC Bioinformatics* **9**, 559 (2008).
- 1011 39. Zhou, Y., Lutz, P.-E., Wang, Y. C., Ragoussis, J. & Turecki, G. Global long non-coding  
1012 RNA expression in the rostral anterior cingulate cortex of depressed suicides. *Transl.*  
1013 *Psychiatry* **8**, 224 (2018).
- 1014 40. Bansal, Y. & Kuhad, A. Mitochondrial Dysfunction in Depression. *Curr. Neuropharmacol.*  
1015 **14**, 610–618 (2016).
- 1016 41. Howard, D. M. *et al.* Genome-wide meta-analysis of depression identifies 102  
1017 independent variants and highlights the importance of the prefrontal brain regions. *Nat.*  
1018 *Neurosci.* **22**, 343–352 (2019).
- 1019 42. Scarpa, J. R. *et al.* Shared Transcriptional Signatures in Major Depressive Disorder and  
1020 Mouse Chronic Stress Models. *Biol. Psychiatry* **88**, 159–168 (2020).
- 1021 43. Hübner, N. S. *et al.* The connectomics of brain demyelination: Functional and structural  
1022 patterns in the cuprizone mouse model. *NeuroImage* **146**, 1–18 (2017).

- 1023 44. Cerina, M. *et al.* Myelination- and immune-mediated MR-based brain network correlates.  
1024 *J. Neuroinflammation* **17**, 186 (2020).
- 1025 45. Boda, E. Myelin and oligodendrocyte lineage cell dysfunctions: New players in the  
1026 etiology and treatment of depression and stress-related disorders. *Eur. J. Neurosci.* **53**,  
1027 281–297 (2021).
- 1028 46. Hemanth Kumar, B. S. *et al.* Demyelinating evidences in CMS rat model of depression: a  
1029 DTI study at 7 T. *Neuroscience* **275**, 12–21 (2014).
- 1030 47. Hercher, C., Turecki, G. & Mechawar, N. Through the looking glass: examining  
1031 neuroanatomical evidence for cellular alterations in major depression. *J. Psychiatr. Res.*  
1032 **43**, 947–961 (2009).
- 1033 48. Miguel-Hidalgo, J. J., Moulana, M., Deloach, P. H. & Rajkowska, G. Chronic  
1034 Unpredictable Stress Reduces Immunostaining for Connexins 43 and 30 and Myelin  
1035 Basic Protein in the Rat Prelimbic and Orbitofrontal Cortices. *Chronic Stress Thousand*  
1036 *Oaks Calif* **2**, (2018).
- 1037 49. Takahashi, K. *et al.* Disturbance of prefrontal cortical myelination in olfactory  
1038 bulbectomized mice is associated with depressive-like behavior. *Neurochem. Int.* **148**,  
1039 105112 (2021).
- 1040 50. Hagemeyer, N. *et al.* A myelin gene causative of a catatonia-depression syndrome upon  
1041 aging. *EMBO Mol. Med.* **4**, 528–539 (2012).
- 1042 51. Roy, K. *et al.* Loss of erbB signaling in oligodendrocytes alters myelin and dopaminergic  
1043 function, a potential mechanism for neuropsychiatric disorders. *Proc. Natl. Acad. Sci. U.*  
1044 *S. A.* **104**, 8131–8136 (2007).
- 1045 52. Chiou, B., Neely, E., Kallianpur, A. & Connor, J. R. Semaphorin4A causes loss of mature  
1046 oligodendrocytes and demyelination in vivo. *J. Neuroinflammation* **16**, 28 (2019).
- 1047 53. Leitner, D. F., Todorich, B., Zhang, X. & Connor, J. R. Semaphorin4A Is Cytotoxic to  
1048 Oligodendrocytes and Is Elevated in Microglia and Multiple Sclerosis. *ASN Neuro* **7**,  
1049 1759091415587502 (2015).
- 1050 54. Chiou, B., Lucassen, E., Sather, M., Kallianpur, A. & Connor, J. Semaphorin4A and H-  
1051 ferritin utilize Tim-1 on human oligodendrocytes: A novel neuro-immune axis. *Glia* **66**,  
1052 1317–1330 (2018).
- 1053 55. Eiza, N., Garty, M., Staun-Ram, E., Miller, A. & Vadasz, Z. The possible involvement of  
1054 sema3A and sema4A in the pathogenesis of multiple sclerosis. *Clin. Immunol. Orlando*  
1055 *Fla* **238**, 109017 (2022).
- 1056 56. Bliss, T. V. P., Collingridge, G. L., Kaang, B.-K. & Zhuo, M. Synaptic plasticity in the  
1057 anterior cingulate cortex in acute and chronic pain. *Nat. Rev. Neurosci.* **17**, 485–496  
1058 (2016).
- 1059 57. Becker, L. J., Journée, S. H., Lutz, P.-E. & Yalcin, I. Comorbidity of chronic pain and  
1060 anxiodepressive disorders: Deciphering underlying brain circuits. *Neurosci. Biobehav.*  
1061 *Rev.* **115**, 131–133 (2020).
- 1062 58. Hirschberg, S., Li, Y., Randall, A., Kremer, E. J. & Pickering, A. E. Functional dichotomy  
1063 in spinal- vs prefrontal-projecting locus coeruleus modules splits descending  
1064 noradrenergic analgesia from ascending aversion and anxiety in rats. *eLife* **6**, e29808  
1065 (2017).
- 1066 59. Gong, Y., Chai, Y., Ding, J.-H., Sun, X.-L. & Hu, G. Chronic mild stress damages  
1067 mitochondrial ultrastructure and function in mouse brain. *Neurosci. Lett.* **488**, 76–80  
1068 (2011).
- 1069 60. Gross, J. A. *et al.* Gene-body 5-hydroxymethylation is associated with gene expression  
1070 changes in the prefrontal cortex of depressed individuals. *Transl. Psychiatry* **7**, e1119  
1071 (2017).
- 1072 61. Nagy, C. *et al.* Single-nucleus transcriptomics of the prefrontal cortex in major  
1073 depressive disorder implicates oligodendrocyte precursor cells and excitatory neurons.  
1074 *Nat. Neurosci.* **23**, 771–781 (2020).
- 1075 62. Tham, M. W., Woon, P. S., Sum, M. Y., Lee, T.-S. & Sim, K. White matter abnormalities  
1076 in major depression: evidence from post-mortem, neuroimaging and genetic studies. *J.*  
1077 *Affect. Disord.* **132**, 26–36 (2011).

- 1078 63. Bae, J. N. *et al.* Dorsolateral prefrontal cortex and anterior cingulate cortex white matter  
1079 alterations in late-life depression. *Biol. Psychiatry* **60**, 1356–1363 (2006).
- 1080 64. Bhatia, K. D., Henderson, L. A., Hsu, E. & Yim, M. Reduced integrity of the uncinate  
1081 fasciculus and cingulum in depression: A stem-by-stem analysis. *J. Affect. Disord.* **235**,  
1082 220–228 (2018).
- 1083 65. Hyett, M. P., Perry, A., Breakspear, M., Wen, W. & Parker, G. B. White matter alterations  
1084 in the internal capsule and psychomotor impairment in melancholic depression. *PLoS*  
1085 *One* **13**, e0195672 (2018).
- 1086 66. Zhou, B., Zhu, Z., Ransom, B. R. & Tong, X. Oligodendrocyte lineage cells and  
1087 depression. *Mol. Psychiatry* **26**, 103–117 (2021).
- 1088 67. Cathomas, F. *et al.* Oligodendrocyte gene expression is reduced by and influences  
1089 effects of chronic social stress in mice. *Genes Brain Behav.* **18**, e12475 (2019).
- 1090 68. Liu, J. *et al.* Impaired adult myelination in the prefrontal cortex of socially isolated mice.  
1091 *Nat. Neurosci.* **15**, 1621–1623 (2012).
- 1092 69. Liu, J. *et al.* Clemastine Enhances Myelination in the Prefrontal Cortex and Rescues  
1093 Behavioral Changes in Socially Isolated Mice. *J. Neurosci. Off. J. Soc. Neurosci.* **36**,  
1094 957–962 (2016).
- 1095 70. Birey, F. *et al.* Genetic and Stress-Induced Loss of NG2 Glia Triggers Emergence of  
1096 Depressive-like Behaviors through Reduced Secretion of FGF2. *Neuron* **88**, 941–956  
1097 (2015).
- 1098 71. Shimizu, T. *et al.* Social Defeat Stress in Adolescent Mice Induces Depressive-like  
1099 Behaviors with Reduced Oligodendrogenesis. *Neuroscience* **443**, 218–232 (2020).
- 1100 72. He, B. *et al.* Interactions Among Nerve Regeneration, Angiogenesis, and the Immune  
1101 Response Immediately After Sciatic Nerve Crush Injury in Sprague-Dawley Rats. *Front.*  
1102 *Cell. Neurosci.* **15**, 717209 (2021).
- 1103 73. Santarelli, L. *et al.* Requirement of hippocampal neurogenesis for the behavioral effects  
1104 of antidepressants. *Science* **301**, 805–809 (2003).
- 1105 74. Yalcin, I., Coubard, S., Bodard, S., Chalon, S. & Belzung, C. Effects of 5,7-  
1106 dihydroxytryptamine lesion of the dorsal raphe nucleus on the antidepressant-like action  
1107 of tramadol in the unpredictable chronic mild stress in mice. *Psychopharmacology (Berl.)*  
1108 **200**, 497–507 (2008).
- 1109 75. Deacon, R. M. J. Assessing nest building in mice. *Nat. Protoc.* **1**, 1117–1119 (2006).
- 1110 76. Otabi, H., Goto, T., Okayama, T., Kohari, D. & Toyoda, A. The acute social defeat stress  
1111 and nest-building test paradigm: A potential new method to screen drugs for depressive-  
1112 like symptoms. *Behav. Processes* **135**, 71–75 (2017).
- 1113 77. Can, A. *et al.* The mouse forced swim test. *J. Vis. Exp. JoVE* e3638 (2012)  
1114 doi:10.3791/3638.
- 1115 78. Avants, B. B. *et al.* A reproducible evaluation of ANTs similarity metric performance in  
1116 brain image registration. *NeuroImage* **54**, 2033–2044 (2011).
- 1117 79. Veraart, J., Fieremans, E. & Novikov, D. S. Diffusion MRI noise mapping using random  
1118 matrix theory. *Magn. Reson. Med.* **76**, 1582–1593 (2016).
- 1119 80. Kellner, E., Dhital, B., Kiselev, V. G. & Reiser, M. Gibbs-ringing artifact removal based  
1120 on local subvoxel-shifts. *Magn. Reson. Med.* **76**, 1574–1581 (2016).
- 1121 81. Avants BB, Tustison N, & Song G. Advanced Normalization Tools (ANTs). *Insight J.* 1–  
1122 35 (2009) doi:<https://doi.org/10.54294/uvnhin>.
- 1123 82. Tustison, N. J. *et al.* N4ITK: improved N3 bias correction. *IEEE Trans. Med. Imaging* **29**,  
1124 1310–1320 (2010).
- 1125 83. Veraart, J., Sijbers, J., Sunaert, S., Leemans, A. & Jeurissen, B. Weighted linear least  
1126 squares estimation of diffusion MRI parameters: strengths, limitations, and pitfalls.  
1127 *NeuroImage* **81**, 335–346 (2013).
- 1128 84. Chamier, L. von *et al.* ZeroCostDL4Mic: an open platform to use Deep-Learning in  
1129 *Microscopy*. 2020.03.20.000133  
1130 <https://www.biorxiv.org/content/10.1101/2020.03.20.000133v4> (2020)  
1131 doi:10.1101/2020.03.20.000133.

- 1132 85. Schmidt, U., Weigert, M., Broaddus, C. & Myers, G. Cell Detection with Star-convex  
1133 Polygons. *arXiv* (2018) doi:<https://doi.org/10.48550/arXiv.1806.03535>.
- 1134 86. Weigert, M., Schmidt, U., Haase, R., Sugawara, K. & Myers, G. Star-convex Polyhedra  
1135 for 3D Object Detection and Segmentation in Microscopy. *arXiv* (2020)  
1136 doi:<https://doi.org/10.48550/arXiv.1908.03636>.
- 1137 87. Schindelin, J. *et al.* Fiji: an open-source platform for biological-image analysis. *Nat.*  
1138 *Methods* **9**, 676–682 (2012).
- 1139 88. Bankhead, P. *et al.* QuPath: Open source software for digital pathology image analysis.  
1140 *Sci. Rep.* **7**, 16878 (2017).
- 1141 89. Dobin, A. *et al.* STAR: ultrafast universal RNA-seq aligner. *Bioinforma. Oxf. Engl.* **29**,  
1142 15–21 (2013).
- 1143 90. Anders, S., Pyl, P. T. & Huber, W. HTSeq--a Python framework to work with high-  
1144 throughput sequencing data. *Bioinforma. Oxf. Engl.* **31**, 166–169 (2015).
- 1145 91. Anders, S. & Huber, W. Differential expression analysis for sequence count data.  
1146 *Genome Biol.* **11**, R106 (2010).
- 1147 92. Love, M. I., Huber, W. & Anders, S. Moderated estimation of fold change and dispersion  
1148 for RNA-seq data with DESeq2. *Genome Biol.* **15**, 550 (2014).
- 1149 93. Subramanian, A. *et al.* Gene set enrichment analysis: a knowledge-based approach for  
1150 interpreting genome-wide expression profiles. *Proc. Natl. Acad. Sci. U. S. A.* **102**,  
1151 15545–15550 (2005).
- 1152 94. Schmittgen, T. D. & Livak, K. J. Analyzing real-time PCR data by the comparative C(T)  
1153 method. *Nat. Protoc.* **3**, 1101–1108 (2008).
- 1154  
1155

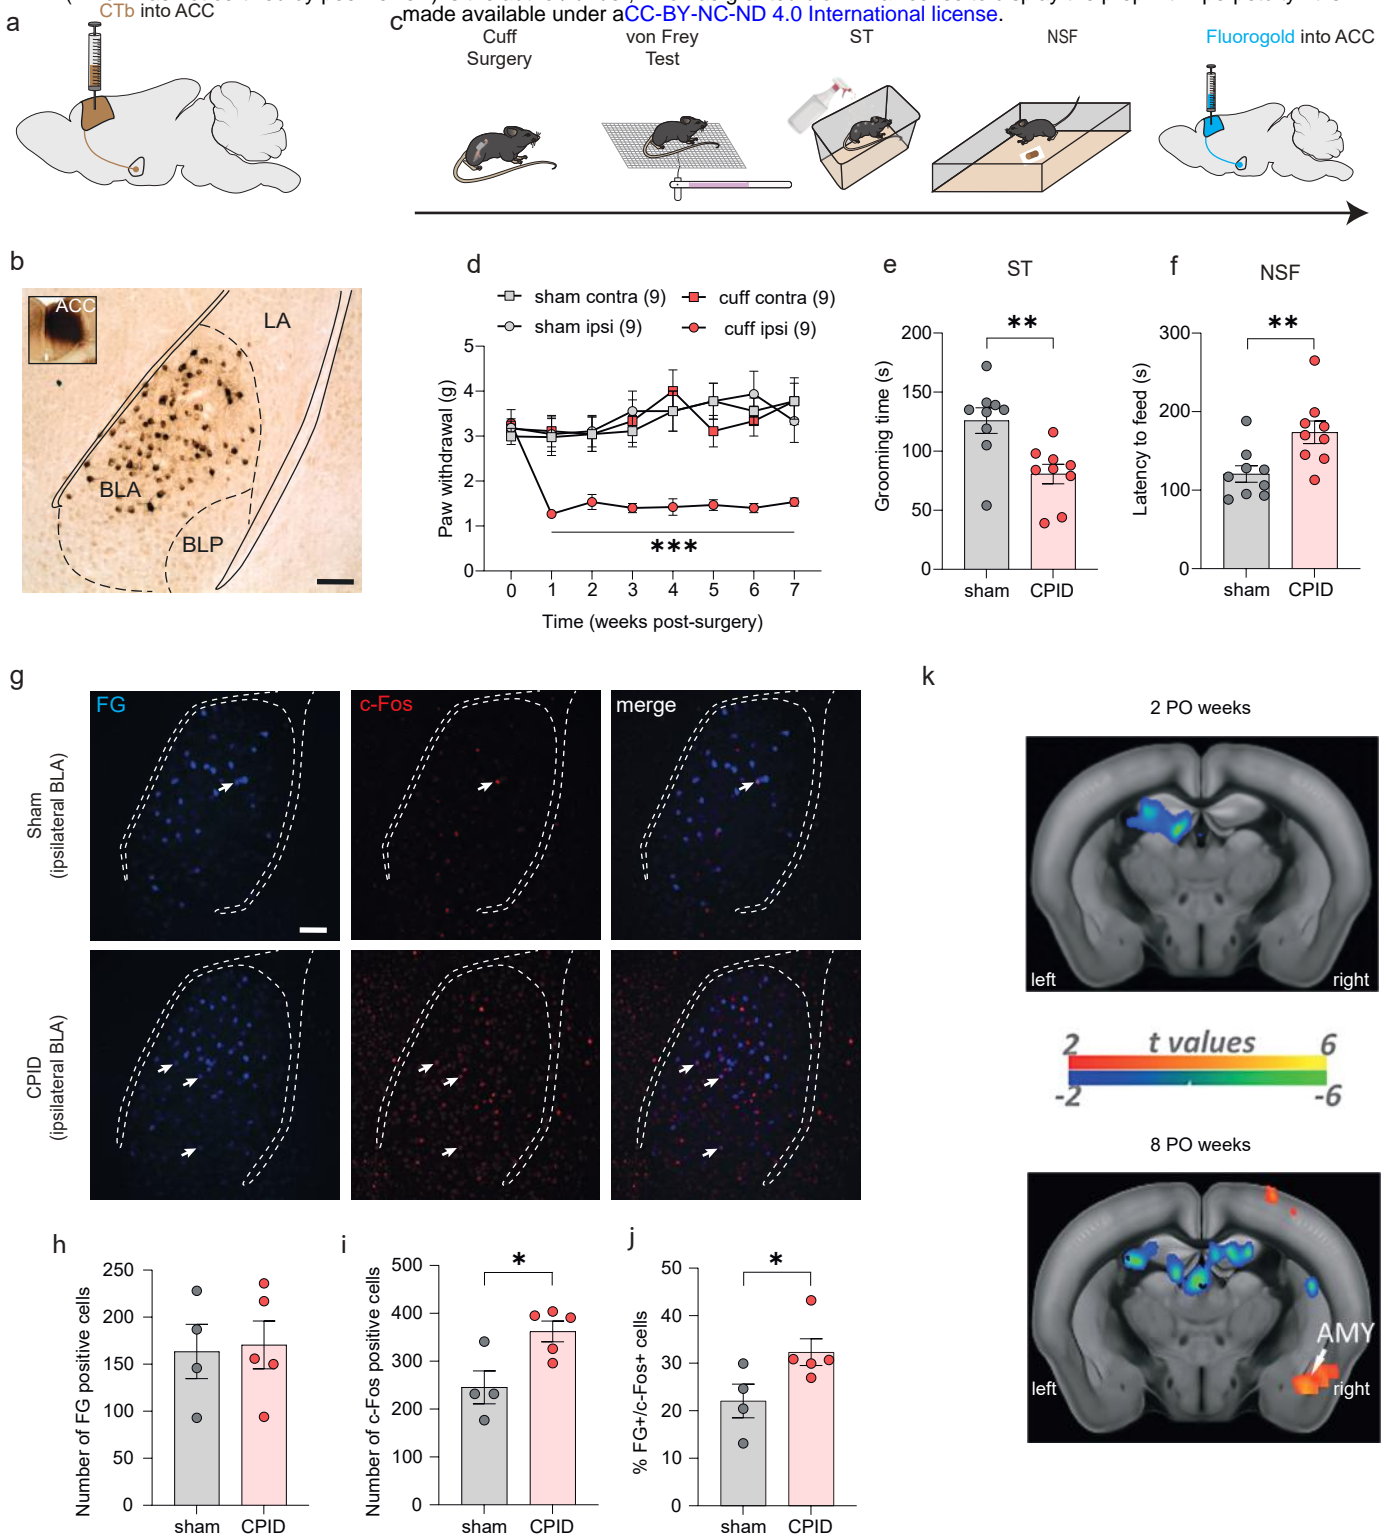



1155 **Figure 1. Chronic pain induced-depression (CPID) triggers hyperactivity in the BLA**  
1156 **neurons projecting to the ACC and increases the functional connectivity between the**  
1157 **ACC and the BLA. a.** Illustration of the retrograde tracing strategy, with the injection of the  
1158 cholera toxin B subunit (CTB) into the mouse ACC. **b.** Representative image of retrogradely  
1159 labelled cell bodies in the BLA. Scale bar=100 $\mu$ m **c.** Experimental design for quantification of  
1160 neuronal activity of BLA neurons projecting to the ACC in the CPID model. Peripheral nerve  
1161 injury is induced by implanting a cuff around the main branch of sciatic nerve. Mechanical  
1162 threshold is evaluated using von Frey filaments, and anxiodepressive-like behaviors using  
1163 splash test (ST) and novelty suppressed feeding test (NSF). Fluorogold is injected into the  
1164 ACC to label the afferent neurons. **d-f.** Peripheral nerve injury induced an ipsilateral long-  
1165 lasting mechanical hypersensitivity (d; sham: n=9; cuff: n=9;  $F_{(21,224)}=2.710$ ;  $p<0.0001$ ; post-  
1166 hoc weeks 1-7  $p<0.05$ ), decreases grooming behavior in the splash test (e; sham: n=9;  
1167  $125.90\pm 10.80$ ; CPID: n=9;  $80.67\pm 8.22$ ;  $p=0.0042$ ) and increases latency to feed in novelty  
1168 suppressed feeding test (NSF) (f; sham: n=9;  $120.7\pm 10.49$ ; CPID: n=9;  $173.7\pm 14.38$ ;  
1169  $p=0.0089$ ). **g.** Representative fluorescence images showing cells positive for fluorogold  
1170 (FG+, left panel), c-Fos (c-Fos+, middle panel), or co-labelled (right panel) cells. **h-j.**  
1171 Quantification of FG+, c-Fos+ cells and their co-localization revealed that, 8 weeks after  
1172 peripheral nerve injury, the number of FG+ cells was not altered (panel h; sham:  
1173  $163.5\pm 28.85$ ; CPID:  $170.6\pm 25.43$ ;  $p=0.3651$ ), while c-Fos+ (panel i; sham:  $245.5\pm 34.37$ ;  
1174 CPID:  $362.4\pm 21.62$ ;  $p=0.0238$ ) and FG+/c-Fos+ cells (panel j; sham  $22.06\%\pm 3.55$ ; CPID:  
1175  $32.32\%\pm 2.81$ ;  $p=0.0159$ ) were increased in the right BLA (sham: n=4; CPID: n=5). Scale  
1176 bar=100 $\mu$ m. **k.** Inter-groups statistical comparison results showed increased functional  
1177 connectivity between the ACC and the amygdala (AMY) at 8 (bottom image) but not 2 post-  
1178 operative (PO) weeks (upper image). FWER corrected at cluster level for  $p<0.05$ . Data are  
1179 represented as mean $\pm$ SEM. \* $p<0.05$ ; \*\* $p<0.01$ . 2-Way ANOVA repeated measures (Time x  
1180 Surgery; VF); unpaired t-test (ST and NSF); one-tailed Mann-Whitney test (FG, c-Fos  
1181 quantification). CPID: Chronic pain induced depression; contra: contralateral; ipsi: ipsilateral,  
1182 LA: lateral nucleus of the amygdala; AMY: amygdala. PO: post-operative.

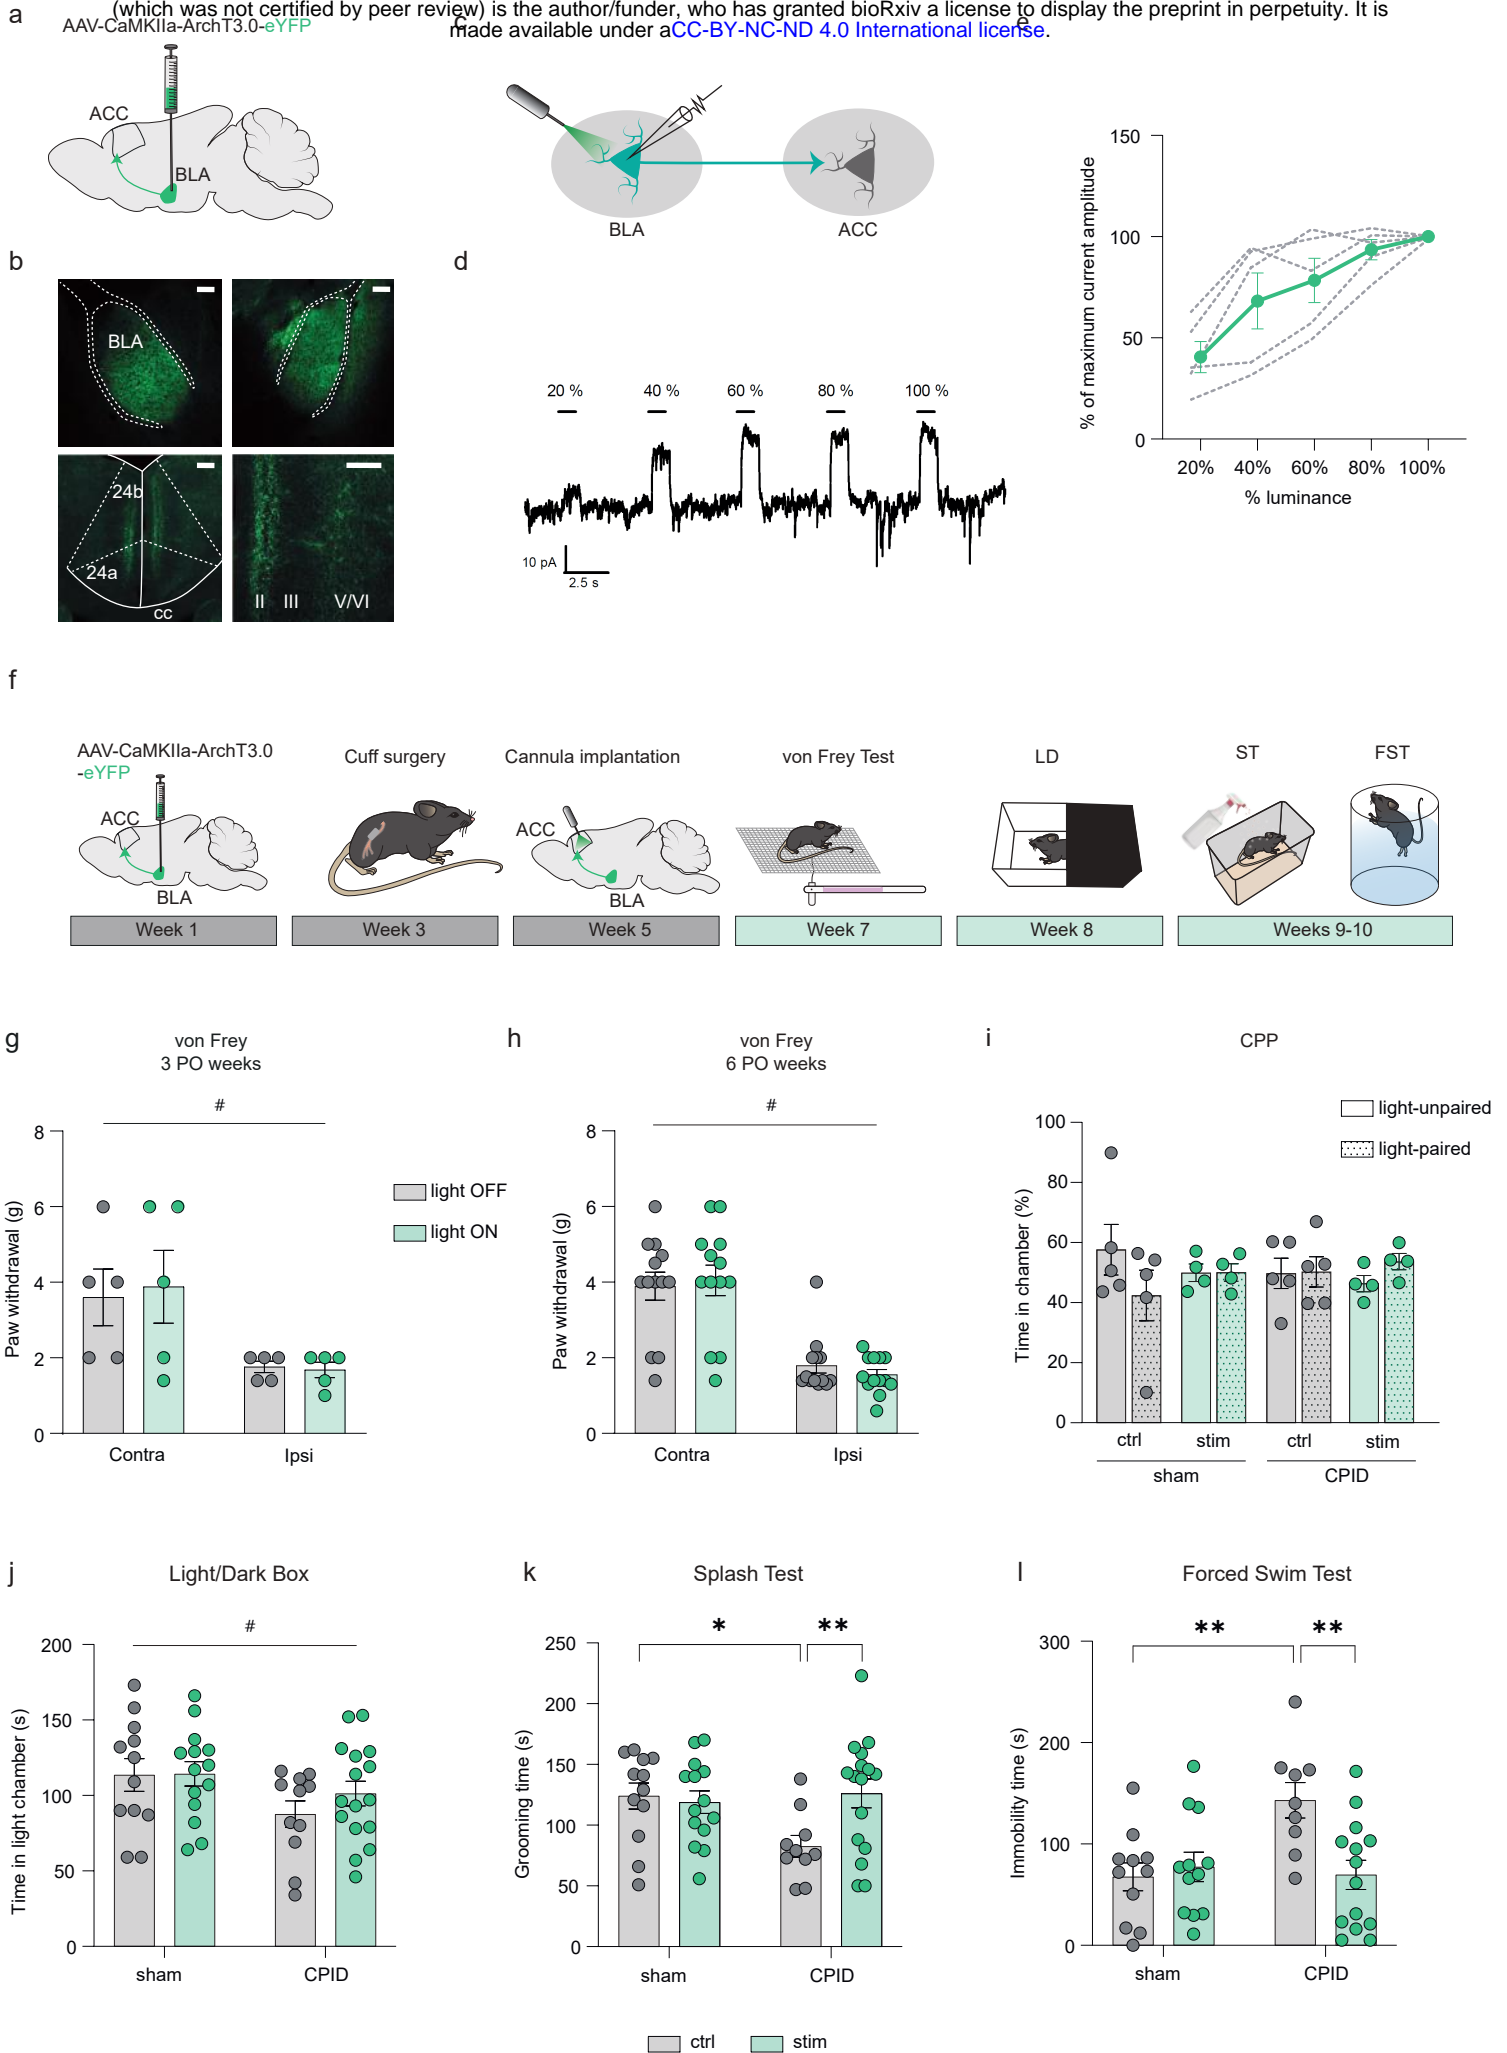

1183 **Figure 2. Optogenetic inhibition of the BLA-ACC pathway blocks CPID.** **a.** Graphical  
1184 representation of inhibitory AAV-CamkIIa-ArchT3.0-eYFP virus delivery to the mouse BLA  
1185 for *ex-vivo* voltage-clamp recordings. **b.** Representative images of eYFP+ cell bodies in the  
1186 BLA (upper panels) and eYFP+ axon terminals in the ACC (lower panels). Scale  
1187 bars=100µm **c.** Graphical representation of the configuration for patch-clamp recording in  
1188 the BLA **d.** Representative trace of the outward currents induced by optogenetic stimulation  
1189 with increased luminance in a BLA neuron. **e.** Amplitude of currents induced by optogenetic  
1190 stimulations of BLA neurons as a function of light stimulation intensity (green trace=mean;  
1191 grey traces=individual responses). **f.** Graphical representation of the experimental design for  
1192 *in-vivo* optogenetic inhibition of the BLA-ACC pathway, including bilateral virus delivery,  
1193 peripheral nerve injury (cuff), cannula implantation, and behavioral testing. **g-h.** At 3 or 6  
1194 weeks after peripheral nerve injury, mechanical hypersensitivity was not affected by the  
1195 inhibition of BLA-ACC pathway (ipsi vs contra; 3 PO weeks  $F_{(1,4)}=7.752$ ;  $p=0.0496$ ; 6 PO  
1196 weeks  $F_{(1,12)}=55.80$ ;  $p<0.0001$ ; light-off vs light-on; 3 PO weeks  $F_{(1,4)}=0.669$ ;  $p=0.4592$ ; 6 PO  
1197 weeks  $F_{(1,12)}=2.971$ ;  $p=0.1104$ ). **i.** Optogenetic inhibition of the BLA-ACC pathway did not  
1198 induce a place preference at 6 weeks PO in sham and CPID animals for the chamber in  
1199 which light was delivered ( $F_{(3,13)}=0.153$ ;  $p=0.9998$ ). **j.** At 7 weeks PO, optogenetic inhibition  
1200 of the BLA-ACC pathway applied 5 minutes before the light-dark test, did not affect the  
1201 decreased time spent in the light chamber observed in nerve-injured animals (sham vs  
1202 CPID:  $F_{(1,49)} = 4.703$ ;  $p=0.035$ ; ctrl vs stim:  $F_{(1,49)}=0.634$ ;  $p=0.43$ ). **k.** At 8 weeks PO,  
1203 optogenetic inhibition of BLA-ACC pathway during the splash test reversed the decreased  
1204 grooming behavior observed in nerve-injured non-stimulated animals without having any  
1205 effect on sham animals ( $F_{(1,48)}=4.991$ ;  $p=0.03$ ; post-hoc: sham-ctrl (n=12) > CPID-ctrl (n=10);  
1206  $p<0.05$ ; CPID-ctrl (n=10) < CPID-stim(n=16);  $p<0.05$  sham-ctrl (n=12) = sham-stim (n=14)).  
1207 **l.** At 8 weeks PO, optogenetic inhibition of BLA-ACC pathway applied 5 minutes before the  
1208 FST, blocked the increased immobility time observed in nerve-injured non-stimulated  
1209 animals without having any effect on sham animals ( $F_{(1,42)}=7.539$ ;  $p=0.008$ , post-hoc: sham-  
1210 ctrl (n=11) > CPID-ctrl (n=9),  $p<0.05$ ; CPID-ctrl (n=9) > CPID-stim (n=14),  $p<0.01$ ; sham-ctrl  
1211 (n=11) = sham-stim (n=12)). Data are represented as mean±SEM. #=main effect; \* $p<0.05$ ;  
1212 \*\* $p<0.01$ . Two-way ANOVA repeated measures (von Frey); Two-way ANOVA (Surgery x  
1213 Stimulation; LD, ST and FST). PO: post-operative. 24a, 24b: areas 24a and 24b of the ACC;  
1214 II, III, V/VI: cortical layers of the ACC; cc: corpus callosum.

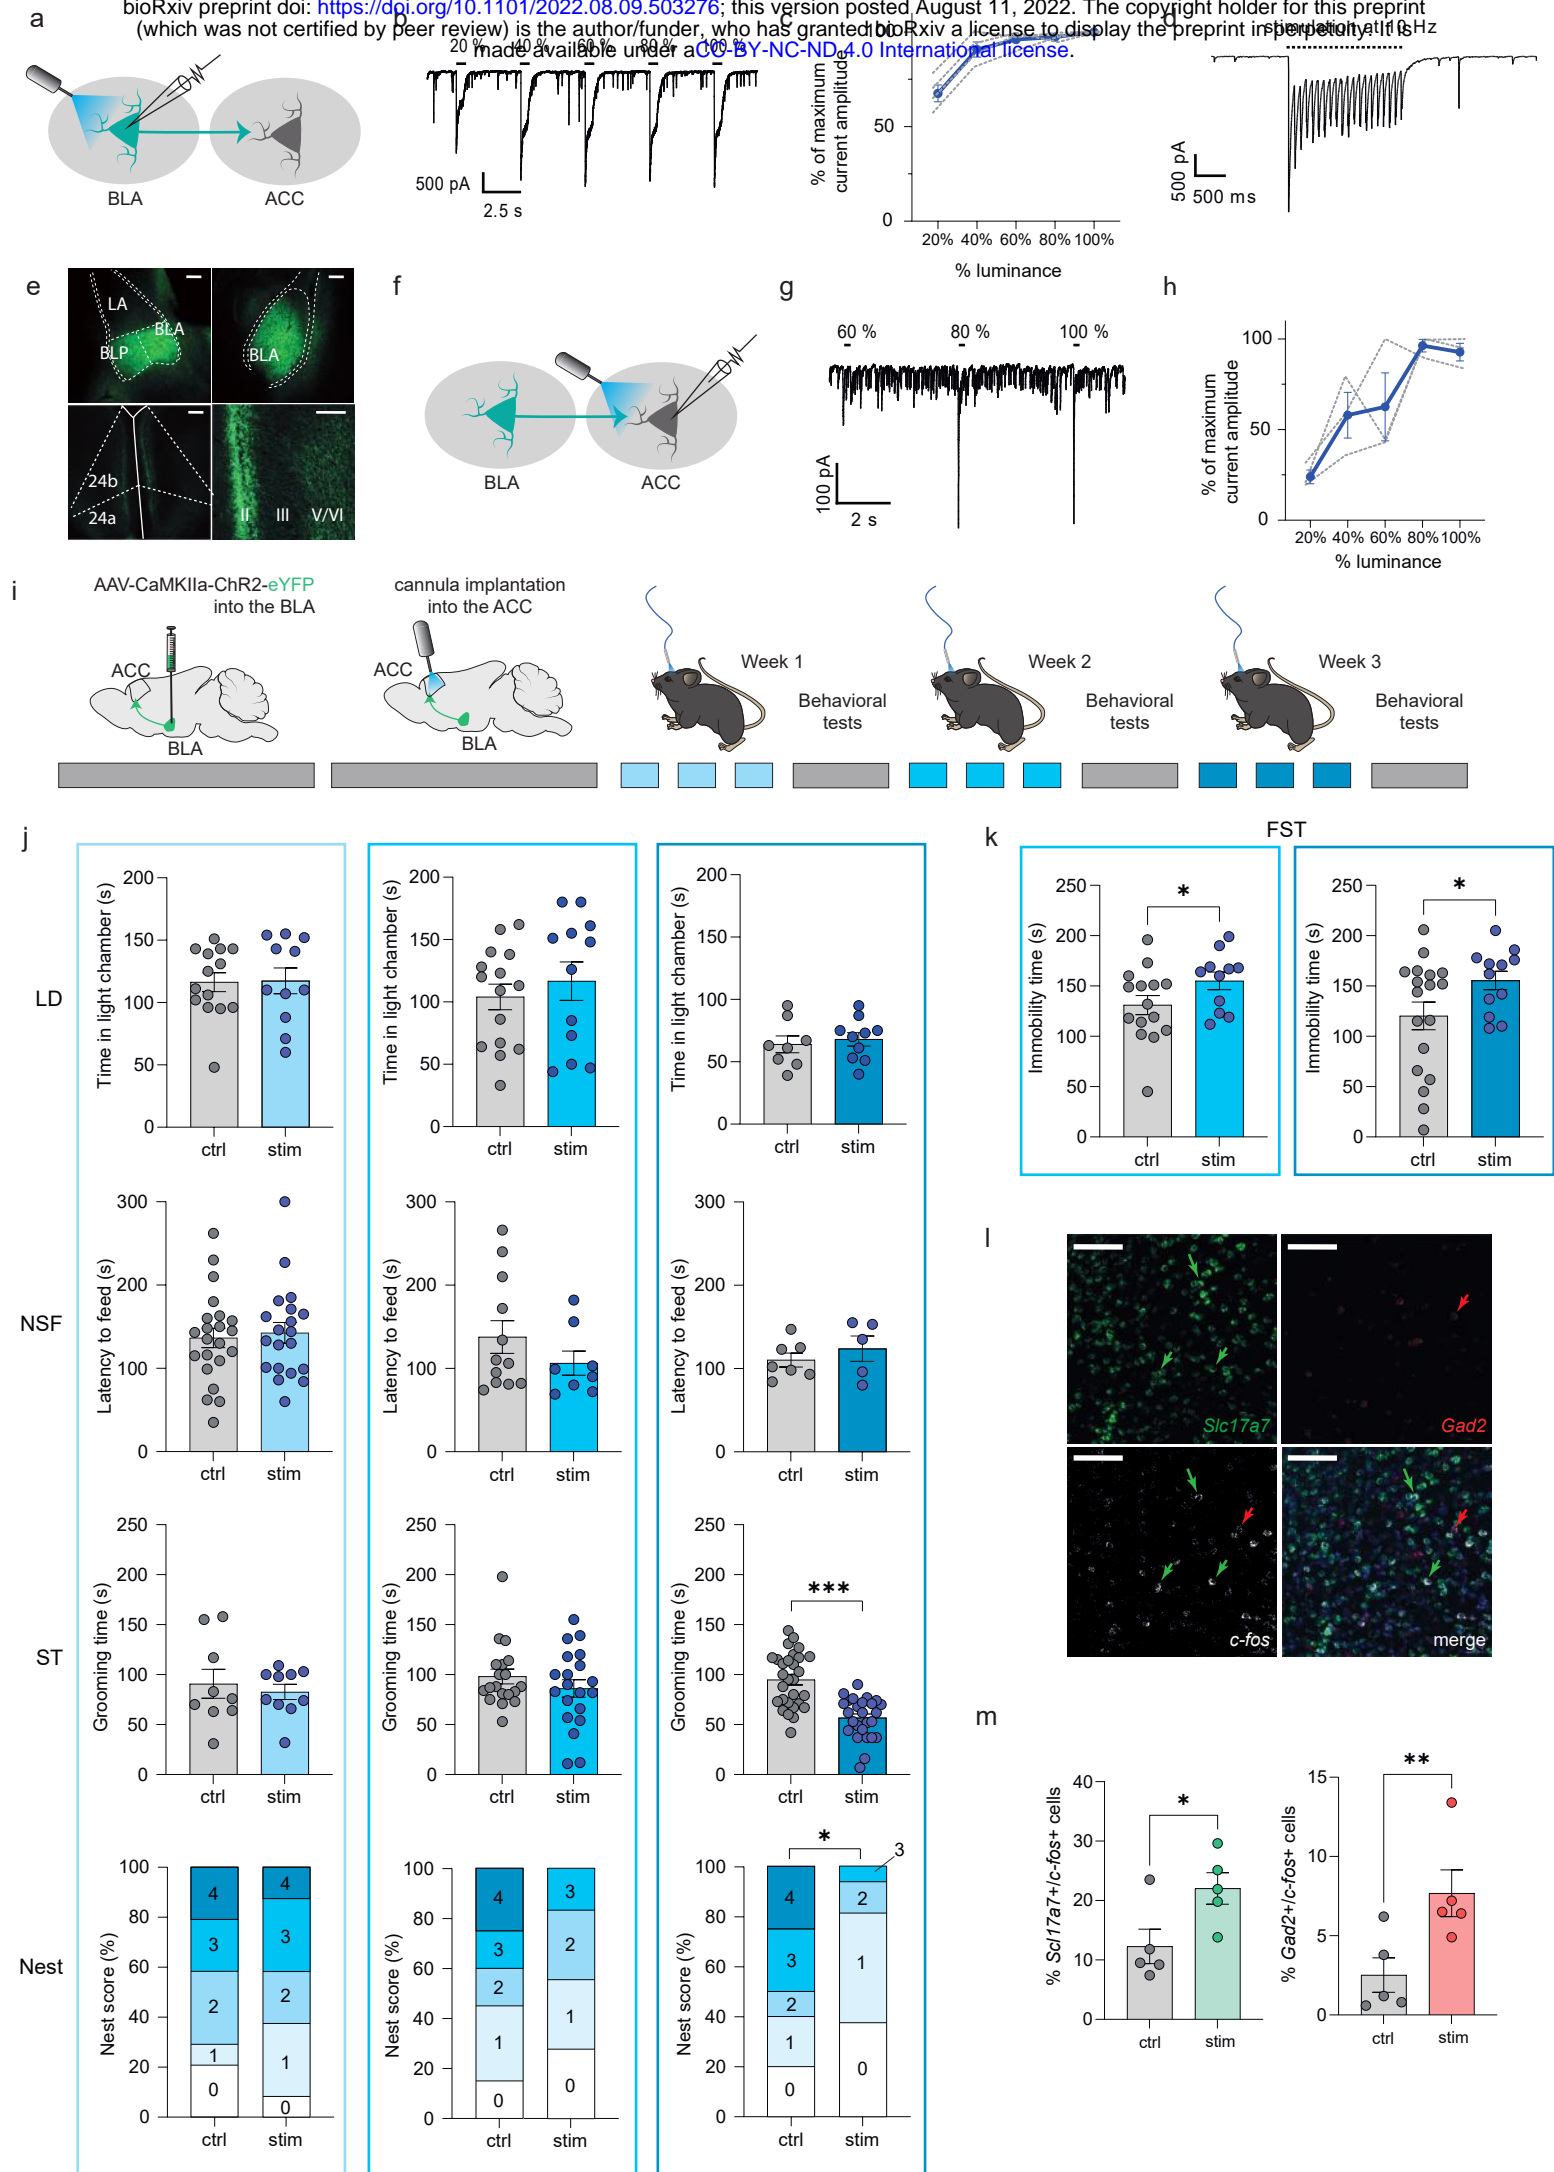

1215 **Figure 3. Repeated activation of the BLA-ACC pathway triggers depressive-like**  
1216 **behaviors in naive mice. a.** Graphical representation of the configuration for *ex-vivo*  
1217 voltage-clamp recordings in the BLA. **b.** Representative trace of response of BLA neurons to  
1218 10Hz optogenetic activation showing that after an initial decrease in the amplitude of light-  
1219 induced currents, a plateau is reached **c.** Representative trace of the outward currents  
1220 induced by optogenetic stimulation with increased luminance in a BLA neuron. **d.** Amplitude  
1221 of currents evoked by optogenetic stimulation of BLA neurons as a function of light  
1222 stimulation intensity (blue trace=mean; grey traces=individual responses). **e.** Representative  
1223 images of eYFP+ cell bodies in the BLA (upper panels) and eYFP+ axon terminals in the  
1224 ACC (lower panels). Scale bars=100 $\mu$ m. **f.** Graphical representation of the configuration for  
1225 *ex-vivo* voltage-clamp recordings in the ACC. **g.** Representative trace of the inward currents  
1226 induced by optogenetic activation of BLA terminals within the ACC with increased  
1227 luminance. **h.** Amplitude of currents evoked by optogenetic stimulations of BLA terminals  
1228 recorded in ACC pyramidal neurons as a function of light stimulation intensities (blue  
1229 trace=mean; grey traces=individual responses). **i.** Graphical representation of the  
1230 experimental design for *in vivo* optogenetic activation of the BLA-ACC pathway, including  
1231 bilateral virus delivery, cannula implantation and behavioral testing. **j.** Repeated activation of  
1232 the BLA-ACC pathway did not induce anxiety-like behaviors in the LD (3 stim: ctrl: n=14;  
1233 116.4 $\pm$ 7.57; stim: n=11; 117.4 $\pm$ 10.31; p=0.94; 6 stim: ctrl: n=15; 104.0 $\pm$ 10.31; stim: n=12;  
1234 116.7 $\pm$ 15.37; p=0.49; 9 stim: ctrl: n=8; 64.0 $\pm$ 6.73; stim: n=10; 68.0 $\pm$ 5.34; p=0.64) and the  
1235 NSF (3 stim: ctrl: n=22; 136.5 $\pm$ 11.65; stim: n=20; 142.6 $\pm$ 12.44; p=0.72; 6 stim: ctrl: n=12;  
1236 137.8 $\pm$ 19.52; stim: n=8; 106.4 $\pm$ 14.51; p=0.26; 9 stim: ctrl: n=7; 110.3 $\pm$ 8.36; stim: n=5;  
1237 123.8 $\pm$ 15.24; p=0.42) tests. While 3 and 6 sessions of optogenetic activation of the BLA-  
1238 ACC pathway did not change the grooming behavior in the splash test (ST) (3 stim: ctrl: n=9;  
1239 90.78 $\pm$ 14.42; stim: n=10; 82.70 $\pm$ 7.52; p=0.62; 6 stim: ctrl: n=19; 98.16 $\pm$ 7.37; stim: n=20;  
1240 86.10 $\pm$ 8.7; p=0.30) and nest scores in nest test (3 stim: ctrl: n=24; stim: n=24; Chi-  
1241 square=0.012; p=0.91; 6 stim: ctrl: n=20; stim: n=18; Chi-square=2.81; p=0.094), 9  
1242 stimulation decreased grooming time (ctrl : n=29; 94.79 $\pm$ 5.02; stim: n=26; 56.81 $\pm$ 3.96;  
1243 p<0.0001) and nest quality (ctrl: n=20; stim: n=16; Chi-square=7.35; p=0.0067) in stimulated  
1244 animals. **k.** The immobility time was increased after 6 and 9 stimulations of the BLA-ACC  
1245 pathway in the forced swim test (FST; 6 stim: ctrl: n=15; 131.1 $\pm$ 9.47; stim: n=11; 155.1 $\pm$ 8.71;  
1246 p=0.042; 9 stim: ctrl: n=18; 120.3 $\pm$ 13.69; stim: n=12; 155.5 $\pm$ 9.15; p=0.033). **l.**  
1247 Representative images of *Slc17a7* (upper-left panel), *Gad2* (upper-right panel), *c-fos* (lower-  
1248 left panel) mRNA expression and their co-localization (lower-right panel) in the ACC  
1249 following BLA-ACC activation, measured by RNA scope. Scale bars=100 $\mu$ m. **m.** In the ACC,  
1250 the proportion of *Slc17a7*+/*c-fos*+ cells (green) and the proportion of *Gad2*+/*c-fos*+ cells  
1251 (red) was increased in stimulated animals (ctrl: n=5; stimulated : n=5; *Gad2*+/*c-fos*+

1252 2.52±1.09; stim: 7.68±1.48, p=0.008; *Slc17a7*/*c-fos*+: ctrl: 12.28±2.89; stim: 22.04±2.64,  
1253 p=0.028). Data are represented as mean ± SEM. \*p<0.05; \*\*p<0.01; \*\*\*p<0.001. unpaired t-  
1254 test (LD, NSF, ST); chi-square test for trend (Nest test); one-tailed Mann-Whitney test (*c-*  
1255 *fos/Slc17a7*, *c-fos/Gad2* mRNA quantification). 24a, 24b: areas 24a and 24b of the ACC; II,  
1256 III, V/VI: cortical layers of the ACC.

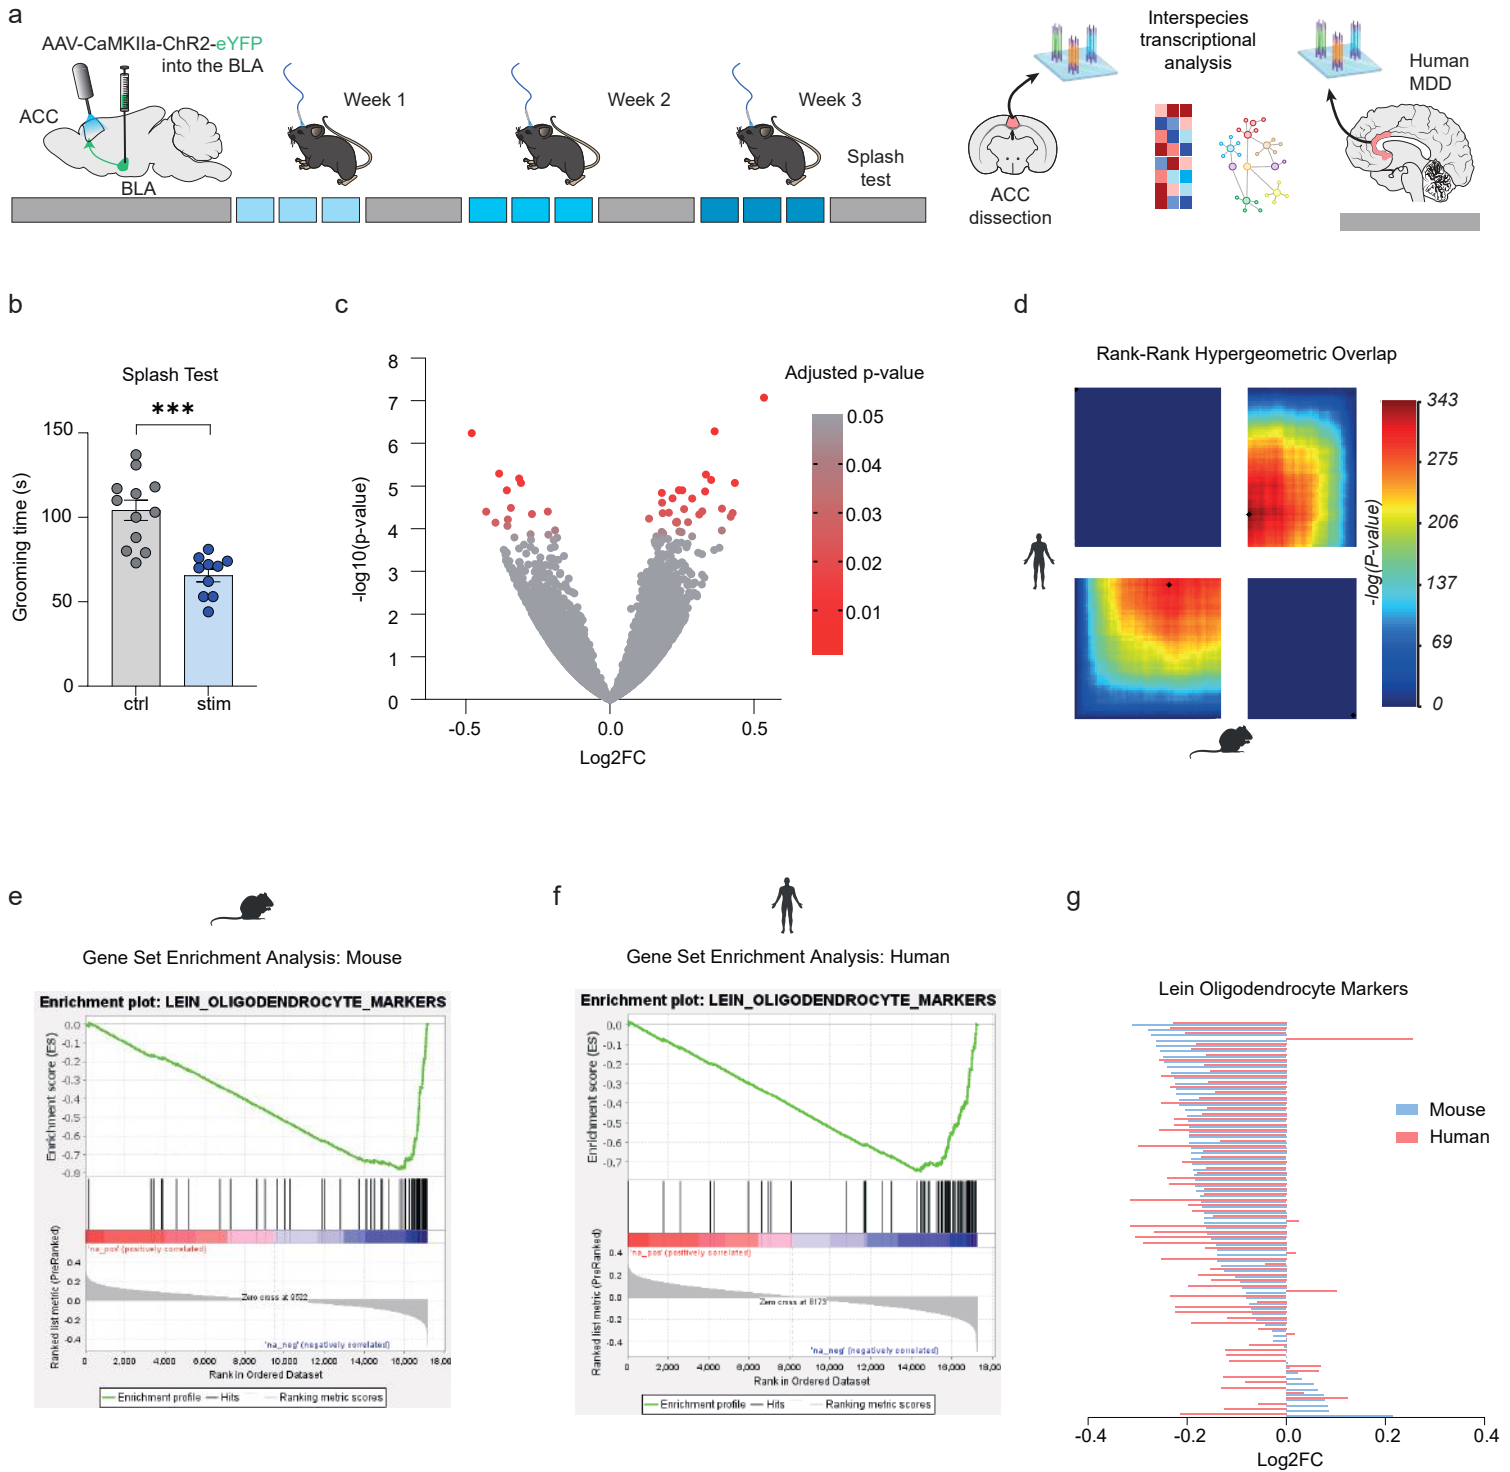

1257 **Figure 4. Repeated activation of the BLA-ACC pathway induces transcriptional**  
1258 **alterations similar to those observed in human depressed patients. a.** Graphical  
1259 representation of experimental design, including virus delivery into the BLA, cannula  
1260 implantation into the ACC, 9 sessions of optogenetic activation, ACC extraction in mice, and  
1261 transcriptomic analysis in mice and human. **b.** 9 sessions of optogenetic activation of the  
1262 BLA-ACC pathway decreases grooming behaviors in stimulated animals used for RNA-  
1263 Sequencing (ctrl: n=12; 104.2±6.0; stim: n=10; 65.60±3.80; p<0.0001). **c.** Volcano plot  
1264 showing the bidirectional distribution of the 2611 (6.9% of all genes) genes differentially  
1265 expressed between stimulated (n=10) and control animals (n=12): red circles depict the 54  
1266 genes that showed a significant dysregulation after correction for multiple testing  
1267 (padj<0.05). **d.** Rank-Rank Hypergeometric Overlap (RRHO2) unravels shared  
1268 transcriptomic changes in the ACC across mice and men as a function of optogenetic  
1269 stimulation (mouse) or a diagnosis of major depressive disorder (MDD). Levels of  
1270 significance for the rank overlap between men and mice are color-coded, with a maximal  
1271 Fisher's Exact Test (FET) p=1.26E-153 for up-regulated genes (lower-left panel), and a  
1272 maximal FET p=1.64E-127 for down-regulated genes (upper-right panel). **e-g** Gene set  
1273 enrichment analysis (GSEA) revealed an enrichment for genes specifically expressed by  
1274 oligodendrocytes and showing evidence of down-regulation as a function of optogenetic  
1275 stimulation (e) or MDD diagnosis (f). The direction of the change correlated across mice and  
1276 human (g; r<sup>2</sup>=0.15, p=0.0005). Behavioral data is represented as mean ± SEM, \*\*\*p<0.001,  
1277 unpaired t-test.



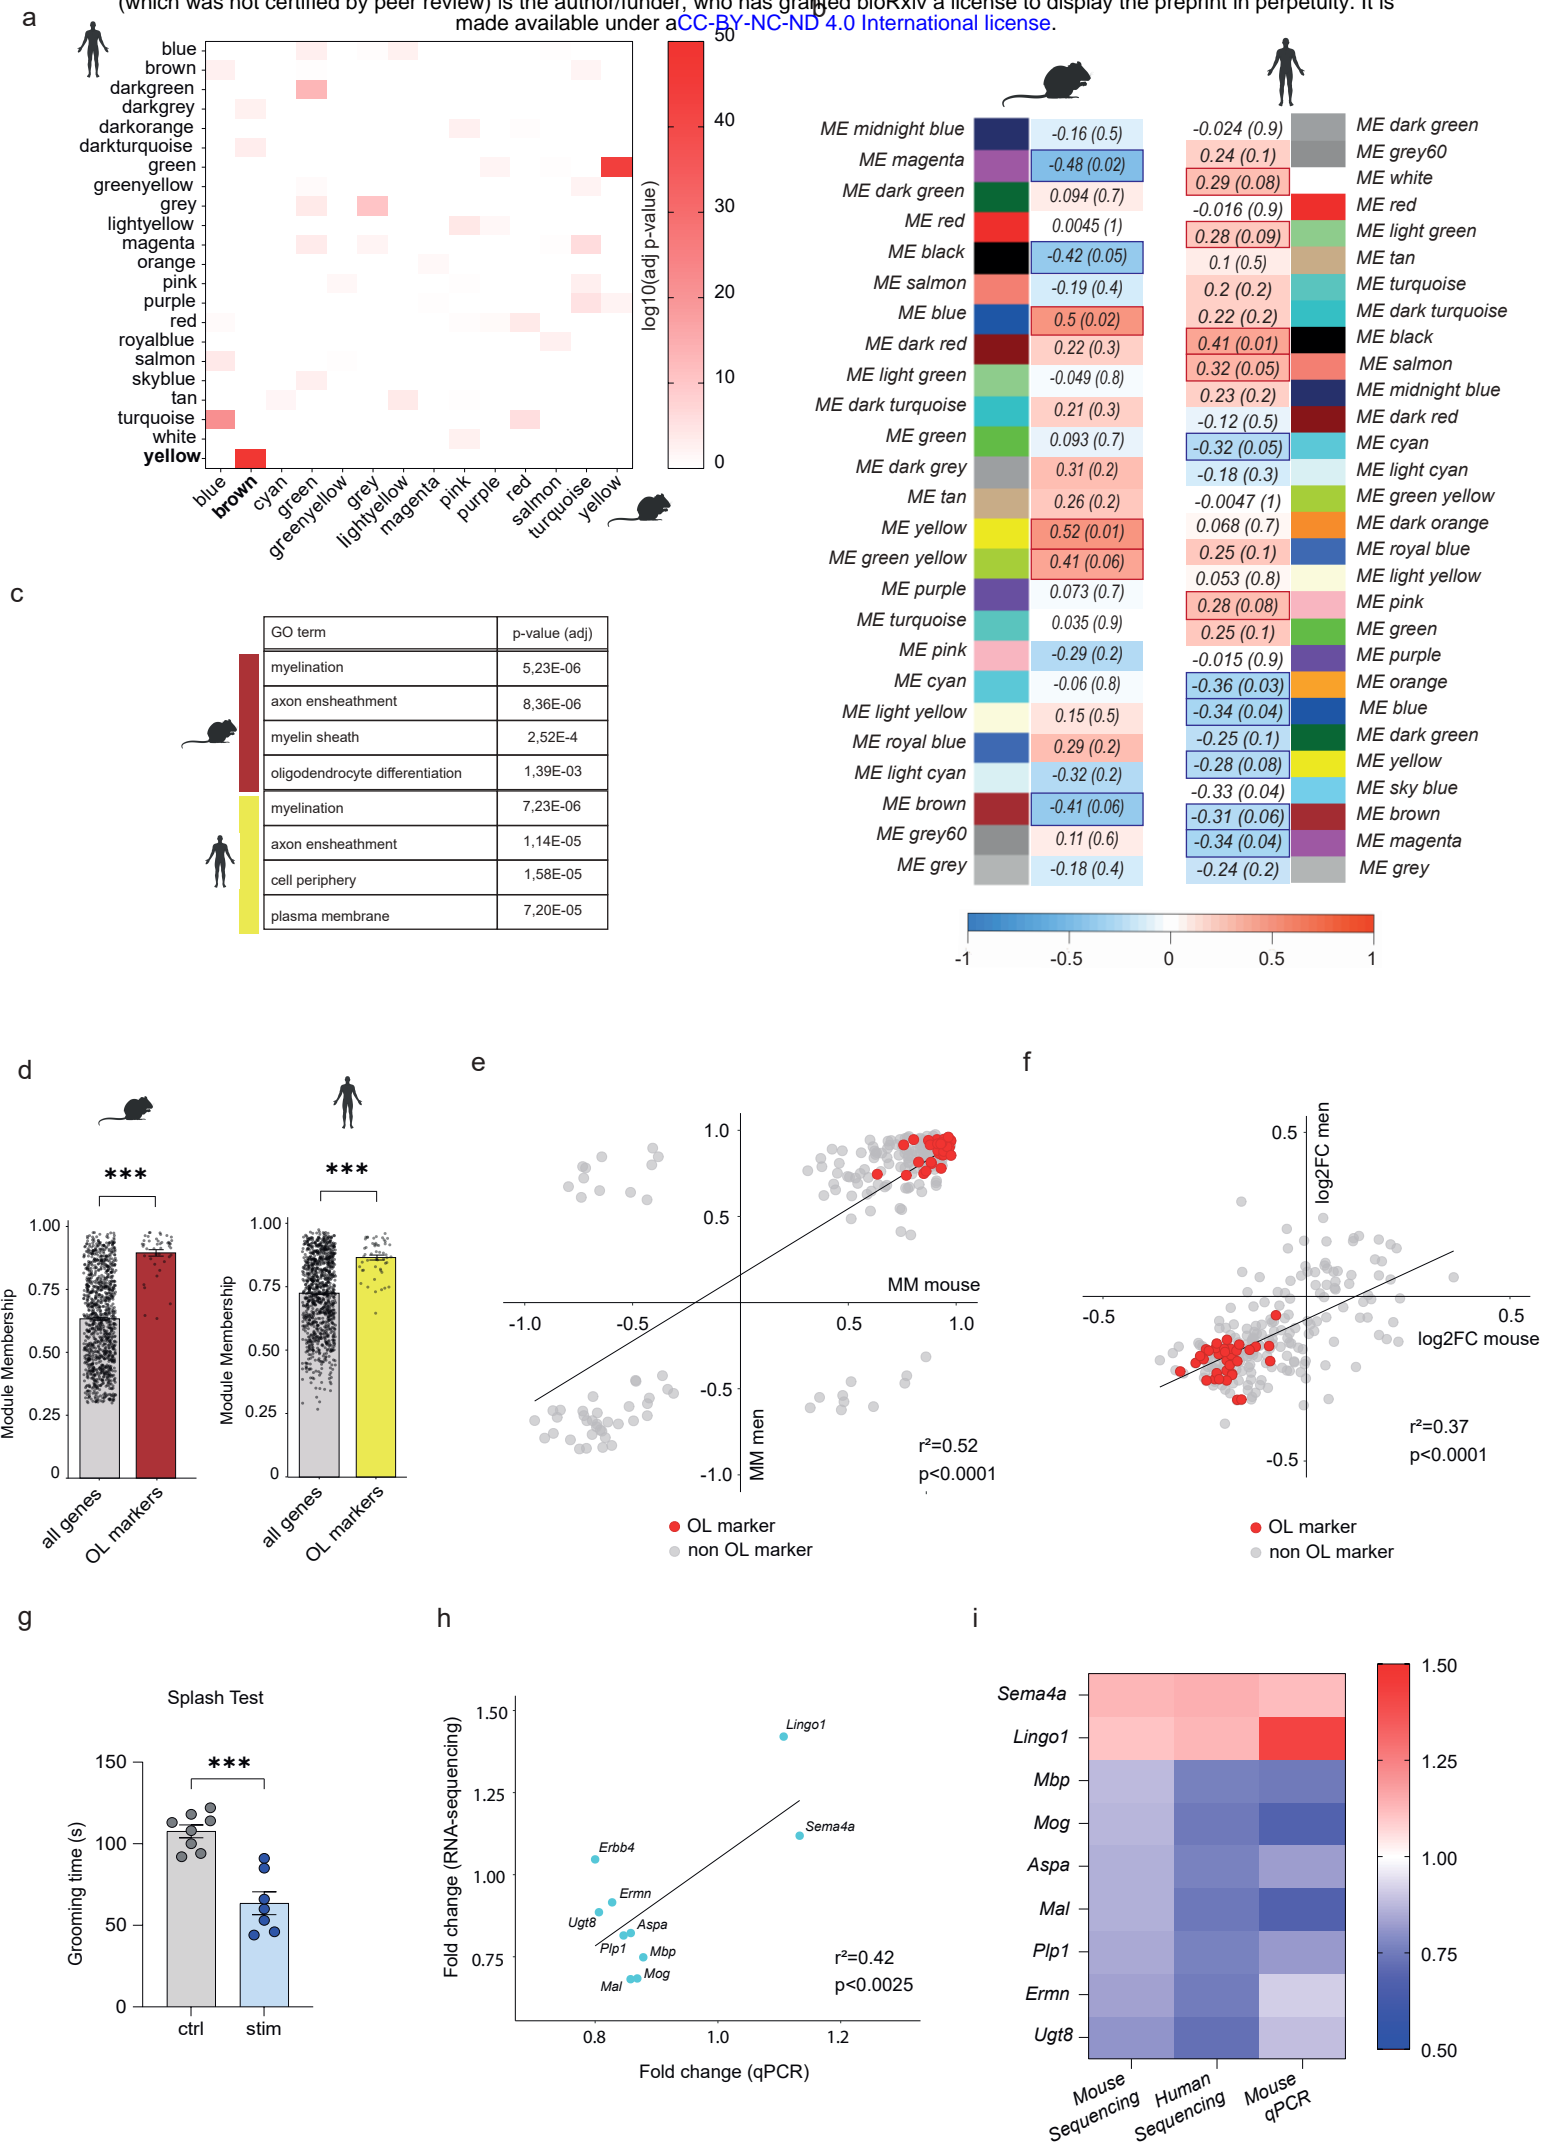

1278 **Figure 5. Gene-network analysis points toward an alteration of myelination and**  
1279 **oligodendrocyte in mice and men. a.** Heatmap representing the level of significance of  
1280 overlaps between mice and men gene modules (measured using the FET). The highest  
1281 overlap ( $p=8.36E-49$ ) was obtained for the human/yellow and mouse/brown modules. **b.**  
1282 WGCNA was used to analyze network and modular gene co-expression in the mouse and  
1283 men ACC. The tables depict associations between individual gene modules and: i)  
1284 optogenetic stimulation in mice (left panel), ii) or MDD diagnosis in men (right panel). Each  
1285 row corresponds to correlations and p-values obtained against each module's eigengene. **c.**  
1286 Results of Gene Ontology enrichment analysis for human/yellow and mouse/brown module,  
1287 with most significant enrichments corresponding to myelin related genes in both species. **d.**  
1288 The absolute value of the module membership (MM) of oligodendrocytes (OL) markers is  
1289 significantly higher than the MM of all the genes in each module for both mouse/brown (left  
1290 panel;  $p\text{-value}<2.2E-16$ ) or human/yellow (right panel;  $p\text{-value}<2.2E-16$ ) modules. **e.** Linear  
1291 regression of mouse (x-axis) and men (y-axis) MM computed by WGCNA, showing a  
1292 significant positive correlation between Brown and Yellow modules gene ranking ( $r^2=0.52$ ,  
1293  $p=0.0001$ ). Red dots indicate myelin and oligodendrocyte related genes/genes also present  
1294 in the Lein-Oligodendrocytes-Markers data base. **f.** Linear regression of fold changes  
1295 measured by RNA sequencing for men (x-axis) and mouse (y-axis), showing a significant  
1296 positive correlation in the direction of the change in expression of the genes in Mouse/Brown  
1297 and Men/Yellow modules ( $r^2=0.37$ ,  $p<0.0001$ ). Red dots indicate myelin and oligodendrocyte  
1298 related genes/genes also present in the Lein-Oligodendrocytes-Markers data base. **g.**  
1299 Repeated activation of the BLA-ACC decreases grooming time in stimulated animals in  
1300 splash test (ctrl  $n=8$ ;  $107.6\pm3.65$ ; stim  $n=7$ ;  $63.57\pm6.96$ ;  $p<0.0001$ ). **h.** Linear regression of  
1301 fold changes measured by RNA sequencing (x-axis) and qPCR (y-axis), showing a  
1302 significant positive correlation between the two methods ( $r^2=0.42$ ,  $p=0.0025$ ). **i.** Down-  
1303 regulation of the myelin-related genes (*Mbp*,  $p=0.044$ ; *Mog*,  $p=0.026$ ; *Aspa*,  $p=0.078$ ; *Mal*,  
1304  $p=0.038$ ; *Plp1*,  $p=0.080$ ; *Ernmn*,  $p=0.180$ ; *Ugt8*,  $p=0.133$ ) and up-regulation of inhibitors of the  
1305 myelination process (*Lingo1*,  $p=0.114$ ; *Sema4a*,  $p=0.154$ ) was consistently found across  
1306 mice and men by RNA-Sequencing, and was validated by qPCR in mouse after 9  
1307 optogenetic stimulations. Behavioral data is represented as mean $\pm$ SEM, \*\*\* $p<0.0001$ ,  
1308 unpaired t-test.

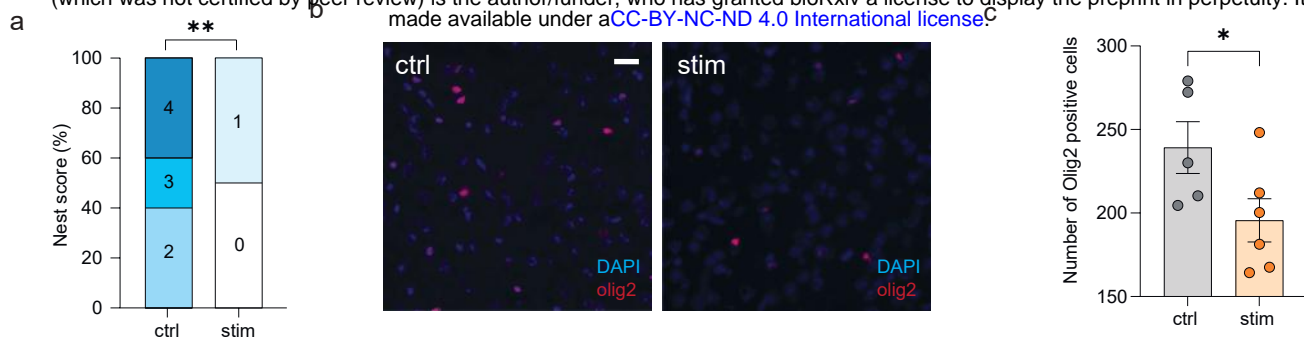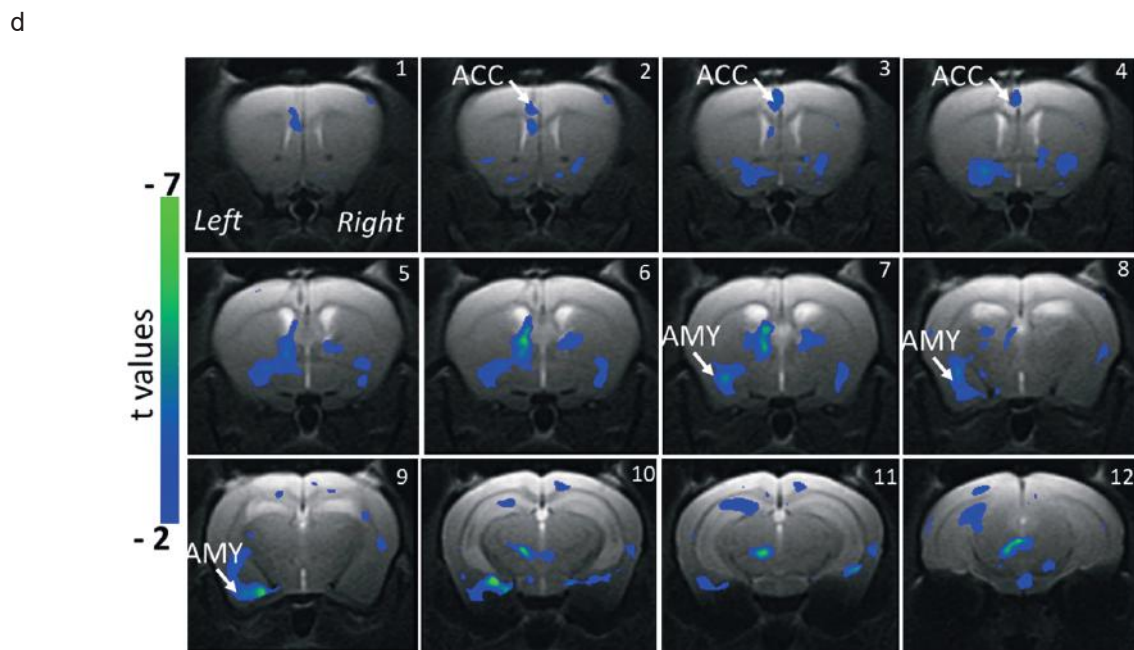

1309 **Figure 6. Repeated activation of the BLA-ACC pathway impairs myelination. a.**  
1310 Repeated activation of the BLA-ACC pathway decreased nest quality in stimulated animals  
1311 (ctrl n=5; stim n=6; Chi-square=8.317; p=0.0039). **b.** Quantification of olig2 positive cells  
1312 showed that repeated (9) stimulation of the BLA-ACC pathway decreased the number of  
1313 olig2+ cells in the ACC (ctrl: n=5; 239.2±15.50; stim: n=6; 195.6±12.95; p=0.041). **c.**  
1314 Representative fluorescence images showing cells that are olig2 positive (red) in non-  
1315 stimulated (left panel) and stimulated mice (right panel). **d.** Representative coronal MRI  
1316 images showing in blue the areas with significant decrease of FA along the left BLA-ACC  
1317 pathway in stimulated animals compared to control group (ctrl: n=7; stim: n=6; GLM p<0.001  
1318 uncorrected) Data are represented as mean±SEM. \*p<0.05; \*\*p<0.01. chi-square test for  
1319 trend (Nest test); one-tailed Mann-Whitney test (olig2 quantification).

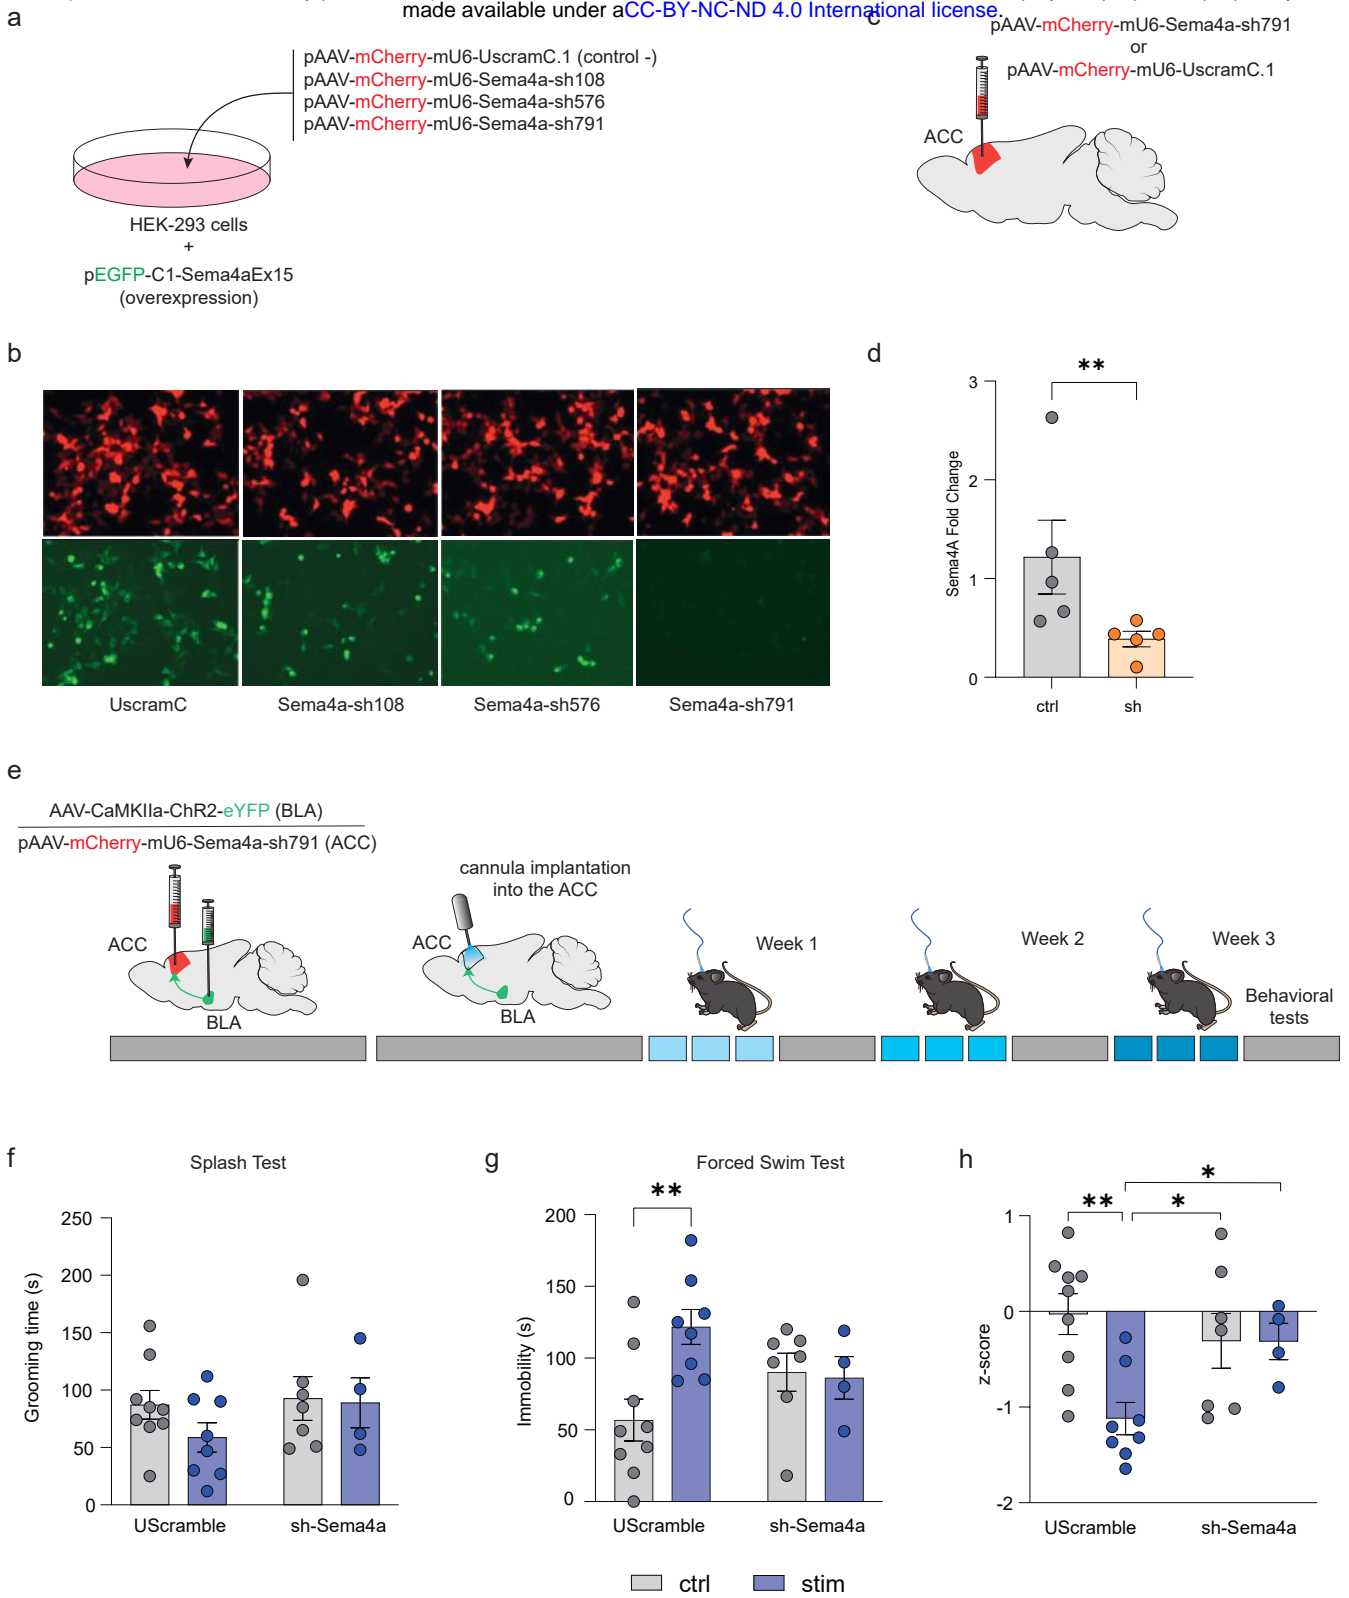

1320 **Figure 7. Semaphorin-4A is essential for the depressive-like behaviors induced by the**  
1321 **activation of the BLA-ACC pathway. a.** Graphical representation of the experimental  
1322 design for AAV validation *in-vitro*. **b.** Representative fluorescence images showing HEK-293  
1323 cells expressing the mouse gene for *Sema4A* (green) and the transfected AAV (red)  
1324 demonstrating the efficiency of the pAAV-mCherry-mU6-Sema4a-sh791 to knock-down  
1325 *Sema4a*. **c.** Graphical representation of the bilateral virus injection in the ACC for *in-vivo*  
1326 validation of the selected sh-RNA. **d.** qPCR analysis showing a down-regulation of *Sema4a*  
1327 expression level in the ACC of mice injected with Sema4a-sh791 (ctrl: n=5; 1.22±0.37; stim:  
1328 n=5; 0.39±0.07; p=0.0079). **e.** Graphical representation of the experimental design, including  
1329 bilateral virus delivery in the BLA (AAV5-CaMKIIa-ChR2(H134R)-EYFP) and the ACC  
1330 (rAAV-mCherry-scrambleUsh or rAAV-mCherry-Sema4a-sh791), cannula implantation,  
1331 optogenetic stimulation and behavioral testing. **f.** Grooming time in the ST was not affected  
1332 by repeated activation of the BLA-ACC pathway or by knocking down *Sema4a* in the ACC  
1333 ( $F_{(1,24)}=0.56$ ; p=0.46). **g.** Knocking down the ACC *Sema4a* prevents the development of  
1334 depressive-like behaviors observed in the FST in animals with repeated activation of the  
1335 BLA-ACC pathway ( $F_{(1,24)}=5.68$ ; p=0.029; post-hoc: Uscramble-Ctrl<Uscramble-Stim;  
1336 p=0.0015; sh-Sema4a-Ctrl=sh-Sema4a-Stim; p=0.87). **h.** Knocking down the ACC *Sema4a*  
1337 normalized the emotionality z-score ( $F_{(1,24)}=5.12$ ; p=0.033; post-hoc: Uscramble-  
1338 Ctrl>Uscramble-Stim; p=0.0011; Uscramble-Stim<sh-Sema4a-Ctrl; p=0.016; Uscramble-  
1339 Stim<sh-Sema4a-Stim; p=0.04; sh-Sema4a-Ctrl=sh-Sema4a-Stim; p=0.99). Data are  
1340 represented as mean±SEM. \*p<0.05; \*\*p<0.01; one-tailed Mann-Whitney test (*Sema4A*  
1341 quantification), Two-way ANOVA (Stimulation x Knock-Down; ST, FST and z-score).
